1 A Novel Susceptibility Locus in *NFASC* Highlights Oligodendrocytes and  
2 Myelination in Progressive Supranuclear Palsy Pathology

3 **Pablo García-González**<sup>1,2,3</sup>, Héctor Rodrigo Lara<sup>4</sup>, Yaroslau Compta<sup>5,6</sup>, Manuel  
4 Fernandez<sup>5,6</sup>, Sven J. van der Lee<sup>7,8,9</sup>, Itziar de Rojas<sup>1,2</sup>, Laura Saiz<sup>10</sup>, Celia Painous<sup>5,6</sup>,  
5 Ana Camara<sup>5,6</sup>, Esteban Muñoz<sup>5,6</sup>, Maria J. Martí<sup>5,6</sup>, Francesc Valldeoriola<sup>5,6</sup>, Raquel  
6 Puerta<sup>1,3</sup>, Ignacio Illán-Gala<sup>11,2</sup>, Javier Pagonabarraga<sup>12,2</sup>, Oriol Dols-Icardo<sup>11,2</sup>, Jaime  
7 Kulisevsky<sup>12,2</sup>, Juan Fortea<sup>11,2</sup>, Alberto Lleó<sup>11,2</sup>, Claudia Olivé<sup>1</sup>, Sterre C.M. de  
8 Boer<sup>13,9,14</sup>, Marc Hulsman<sup>7,8,9</sup>, Yolande A.L. Pijnenburg<sup>8,9</sup>, Rafael Díaz Belloso<sup>15,16</sup>,  
9 Laura Muñoz-Delgado<sup>15,16</sup>, Dolores Buiza Rueda<sup>15,16</sup>, Pilar Gómez-Garre<sup>15,16</sup>, Iban  
10 Aldecoa<sup>17,18</sup>, Gemma Aragonés<sup>17</sup>, Jorge Hernandez Vara<sup>19,16</sup>, Maite Mendioroz<sup>20,21,22</sup>,  
11 Jordi Pérez-Tur<sup>23,2</sup>, Pieter Jelle Visser<sup>24,25,26,27</sup>, Anouk den Braber<sup>24,25,28</sup>, Janne M.  
12 Papma<sup>29,30</sup>, Ángel Martín Montes<sup>2,31,32</sup>, Eloy Rodríguez-Rodríguez<sup>33,2</sup>, Josep Blázquez-  
13 Folch<sup>1</sup>, Andrea Miguel<sup>1</sup>, Fernando García-Gutiérrez<sup>1</sup>, Amanda Cano<sup>1,2</sup>, Sergi Valero<sup>1,2</sup>,  
14 Marta Marquíe<sup>1,2</sup>, María Capdevila-Bayo<sup>1,34</sup>, Maitee Rosende-Roca<sup>35</sup>, Inés Quintela<sup>36</sup>,  
15 Ángel Carracedo<sup>37,38</sup>, Lluís Tàrraga<sup>1,2</sup>, Luis M Real<sup>39,40</sup>, Jose Luis Royo<sup>41</sup>, Maria Elena  
16 Erro<sup>42,43</sup>, Carmen Guerrero<sup>44</sup>, Daniela Corte Torres<sup>45</sup>, Marta Blázquez-Estrada<sup>46,47</sup>,  
17 Beatriz San Millán<sup>48,49</sup>, Susana Teijeira<sup>48,50</sup>, Dolores Vilas Rolan<sup>51</sup>, Isabel Hernández<sup>1,2</sup>,  
18 Antonio Sánchez-Soblechero<sup>52</sup>, Beatriz de la Casa-Fages<sup>53</sup>, Soledad Serrano López<sup>31,32</sup>,  
19 Raquel Baviera-Muñoz<sup>54</sup>, Amaya Lavín<sup>55</sup>, Ricardo Taipa<sup>56,57</sup>, Guillermo Amer<sup>58</sup>, Elena  
20 Martínez-Saez<sup>59,60</sup>, Marta Fernández-Matarrubia<sup>61,62</sup>, Carmen Lage-Martínez<sup>63,2,64</sup>,  
21 Victoria Álvarez<sup>65,47</sup>, Laura Molina-Porcel<sup>66,17</sup>, Henne Holstege<sup>7,8,9</sup>, Pablo Mir<sup>15,16,67</sup>,  
22 Olivia Belbin<sup>68,2</sup>, Mercè Boada<sup>1,2</sup>, Victoria Fernández<sup>1</sup>, **María J. Bullido**<sup>69,2,31,70</sup>,  
23 **Alberto Rábano**<sup>71,2</sup>, **Pascual Sánchez-Juan**<sup>71,2</sup>, **Agustín Ruiz**<sup>1,2,72\*</sup>

24 \* Corresponding author: Agustín Ruiz MD, PhD.

25 *María J. Bullido, Alberto Rábano, Pascual Sánchez-Juan and Agustín Ruiz contributed equally to this work.*

26 <sup>1</sup>Ace Alzheimer Center Barcelona-Universitat Internacional de Catalunya, Barcelona, Spain,

27 <sup>2</sup>CIBERNED, Network Center for Biomedical Research in Neurodegenerative Diseases, National

28 Institute of Health Carlos III, Madrid, Spain, <sup>3</sup>Universitat de Barcelona (UB), Barcelona, Spain, <sup>4</sup>Banco

29 de Cerebros de la Región de Murcia, Hospital Clínico Universitario Virgen de la Arrixaca, El Palmar,

30 Spain, <sup>5</sup>Parkinson's Disease & Movement Disorders Unit, Neurology Service, Hospital Clínic I

31 Universitari de Barcelona; IDIBAPS, CIBERNED (CB06/05/0018-ISCIII), ERN- RND, Institut Clínic de

32 Neurociències (Maria de Maeztu Excellence Centre), Universitat de Barcelona. Barcelona, Catalonia,

33 Spain, <sup>6</sup>Lab of Parkinson Disease and Other Neurodegenerative Movement Disorders: Clinical and

34 Experimental Research; Department of Neurology, Hospital Clínic de Barcelona, Institut

35 D'Investigacions Biomèdiques August Pi I Sunyer (IDIBAPS), Institut de Neurociències, Universitat de

36 Barcelona, Barcelona, Catalonia, Spain, <sup>7</sup>Genomics of Neurodegenerative Diseases and Aging, Human

37 Genetics, Vrije Universiteit Amsterdam, Amsterdam UMC location VUmc, Amsterdam, The

38 Netherlands., <sup>8</sup>Alzheimer Center Amsterdam, Neurology, Vrije Universiteit Amsterdam, Amsterdam

39 UMC location VUmc, Amsterdam, The Netherlands ., <sup>9</sup>Amsterdam Neuroscience, Neurodegeneration,

40 Amsterdam, The Netherlands, <sup>10</sup>Alzheimer's Disease Research Unit, CIEN Foundation, Queen Sofia

41 Foundation Alzheimer Center, Madrid, Spain, <sup>11</sup>Sant Pau Memory Unit, Department of Neurology,

42 Institut de Recerca de Sant Pau; Hospital de Sant Pau, Barcelona, Spain, <sup>12</sup>Movement Disorders Unit,

43 Department of Neurology, Institut de Recerca de Sant Pau; Hospital de Sant Pau, Barcelona, Spain,

44 <sup>13</sup>Alzheimer Center Amsterdam, Neurology, Vrije Universiteit Amsterdam, Amsterdam UMC location

45 VUmc, Amsterdam, The Netherlands., <sup>14</sup>School of Psychology and Brain & Mind Centre, The University

46 of Sydney, Sydney, Australia, <sup>15</sup>Unidad de Trastornos del Movimiento, Servicio de Neurología y

47 Neurofisiología Clínica, Instituto de Biomedicina de Sevilla, IBiS / Hospital Universitario Virgen del

48 **NOTE: This preprint reports new research that has not been certified by peer review and should not be used to guide clinical practice.**

49 Enfermedades Neurodegenerativas (CIBERNED), Instituto de Salud Carlos III, Madrid, Spain.,  
50 <sup>17</sup>Neurological Tissue Bank, Biobanc-Hospital Clínic-FRCB-IDIBAPS, Barcelona, Spain., <sup>18</sup>Pathology  
51 Department, Hospital Clinic de Barcelona-University of Barcelona, Barcelona, Spain, <sup>19</sup>Servicio de  
52 Neurología y Grupo de Enfermedades Neurodegenerativas. Vall d'Hebron Institut de Recerca (VHIR),  
53 Barcelona, Spain, <sup>20</sup>Navarrabiomed, Pamplona, Spain, <sup>21</sup>Department of Neurology, Hospital Universitario  
54 de Navarra, Pamplona, Spain, <sup>22</sup>Instituto de Investigación Sanitaria de Navarra (IDISNA), Pamplona,  
55 Spain, <sup>23</sup>Unitat de Genètica Molecular, Institut de Biomedicina de València-CSIC, Valencia, Spain,  
56 <sup>24</sup>Alzheimer Center Amsterdam, Neurology, Vrije Universiteit Amsterdam, Amsterdam UMC location  
57 VUmc, Amsterdam, The Netherlands, <sup>25</sup>Amsterdam Neuroscience, Neurodegeneration, 1081 HV  
58 Amsterdam, The Netherlands, <sup>26</sup>Alzheimer Center Limburg, School for Mental Health and Neuroscience,  
59 Maastricht University, 6200 MD Maastricht, The Netherlands, <sup>27</sup>Department of Neurobiology, Care  
60 Sciences and Society, Division of Neurogeriatrics, Karolinska Institutet, 171 77 Stockholm, Sweden,  
61 <sup>28</sup>Department of Psychiatry and Neurochemistry, Institute of Neuroscience and Physiology, The  
62 Sahlgrenska Academy, University of Gothenburg, 405 30 Gothenburg, Sweden, <sup>29</sup>Department of  
63 Neurology and Alzheimer Center Erasmus MC, Erasmus MC University Medical Center, Rotterdam, the  
64 Netherlands, <sup>30</sup>Department of Internal Medicine Erasmus MC, Erasmus MC University Medical Center,  
65 Rotterdam, the Netherlands, <sup>31</sup>Hospital La Paz Institute for Health Research, IdiPAZ, Madrid, Spain,  
66 <sup>32</sup>Department of Neurology, La Paz University Hospital, Madrid, Spain, <sup>33</sup>Neurology Service, Marqués de  
67 Valdecilla University Hospital (University of Cantabria and IDIVAL), Santander, Spain, <sup>34</sup>Department of  
68 Pharmacology, Toxicology and Therapeutic Chemistry, Faculty of Pharmacy and Food Science,  
69 Universitat de Barcelona, Spain, <sup>35</sup>Ace Alzheimer Center Barcelona, Universitat Internacional de  
70 Catalunya, Barcelona, Spain, <sup>36</sup>Grupo de Medicina Xenómica, Fundación Pública Galega de Medicina  
71 Xenómica, Santiago de Compostela, Spain, <sup>37</sup>Grupo de Medicina Xenómica, CIBERER, CIMUS.  
72 Universidade de Santiago de Compostela, Santiago de Compostela, Spain, <sup>38</sup>Fundación Pública Galega de  
73 Medicina Xenómica- IDIS, Santiago de Compostela, Spain, <sup>39</sup>Instituto de Biomedicina de Sevilla,  
74 IBiS/Hospital Universitario Virgen de Valme /CSIC/Universidad de Sevilla. Departamento de Bioquímica  
75 Médica, Biología Molecular e Inmunología. Sevilla, Spain, <sup>40</sup>CIBERINFEC, Network Center for  
76 Biomedical Research in Infectious Diseases, National Institute of Health of Carlos III, Madrid, Spain,  
77 <sup>41</sup>Departamento de Especialidades Quirúrgicas, Bioquímica e Inmunología, Facultad de Medicina,  
78 Universidad de Málaga, Málaga, Spain, <sup>42</sup>Servicio de Neurología, Hospital Universitario de Navarra,  
79 Pamplona, Spain, <sup>43</sup>Grupo de investigación Neuroepigenética, Navarrabiomed, Pamplona, Spain, <sup>44</sup>Banco  
80 de Cerebros (Biobanco), Hospital Universitario Fundación Alcorcón, 28922 Alcorcón, Spain, <sup>45</sup>Biobank  
81 of Principado de Asturias, Instituto de Investigación Sanitaria del Principado de Asturias (ISPA), Oviedo,  
82 Spain, <sup>46</sup>Servicio de Neurología, Hospital Universitario Central de Asturias, Spain, <sup>47</sup>Instituto de  
83 Investigación Sanitaria del Principado de Asturias (ISPA), <sup>48</sup>Rare Diseases and Pediatric Medicine  
84 Research Group, Galicia Sur Health Research Institute (IIS Galicia Sur), SERGAS-UVIGO, Hospital  
85 Álvaro Cunqueiro, 36312 Vigo, Spain, <sup>49</sup>Pathology Department, Galicia Sur Health Research Institute  
86 (IIS Galicia Sur). SERGAS-UVIGO. Alvaro Cunqueiro Hospital, Vigo, Spain, <sup>50</sup>Biobank of Galicia Sur  
87 Health Research Institute (Biobank IIS Galicia Sur), SERGAS-UVIGO, Hospital Álvaro Cunqueiro,  
88 36312 Vigo, Spain, <sup>51</sup>Movement Disorders Unit, Neurology Service, Hospital Germans Trias i Pujol,  
89 Badalona, Barcelona, Spain, <sup>52</sup>Department of Neurology, Instituto de Investigación Sanitaria Gregorio  
90 Marañón, Hospital General Universitario Gregorio Marañón, Madrid, Spain, <sup>53</sup>Movement Disorders Unit,  
91 Neurology Department, Instituto de Investigación Sanitaria Gregorio Marañón, Hospital General  
92 Universitario Gregorio Marañón, Madrid, Spain, <sup>54</sup>Molecular, Cellular and Genomics Biomedicine  
93 Research Group. Instituto de Investigación Sanitaria La Fe, Valencia, Spain, <sup>55</sup>Navarrabiomed, Hospital  
94 Universitario de Navarra (HUN), Universidad Pública de Navarra (UPNA), IdiSNA, Pamplona, Spain,  
95 <sup>56</sup>Department of Neuropathology, Centro Hospitalar Universitário de Santo António, Porto, Portugal,  
96 <sup>57</sup>UMIB - Unit for Multidisciplinary Research in Biomedicine, ICBAS - School of Medicine and  
97 Biomedical Sciences, University of Porto, 4050-313, Porto, Portugal, <sup>58</sup>Cognitive Neurology Unit, Son  
98 Espases University Hospital, Palma, Spain, <sup>59</sup>Pathology Department, Neuropathology. Vall d'Hebron  
99 University Hospital, Barcelona, Spain, <sup>60</sup>Vall d'Hebron University Hospital Biobank, Vall d'Hebron  
100 Hospital Research Institute, Barcelona, Spain, <sup>61</sup>Department of Neurology, Clínica Universidad de  
101 Navarra, Pamplona, Spain, <sup>62</sup>IdiSNA, Navarra Institute for Health Research, Pamplona, Spain,  
102 <sup>63</sup>Neurology Service, Marqués de Valdecilla University Hospital-IDIVAL, Santander, Spain, <sup>64</sup>Atlantic  
103 Fellow for Equity in Brain health, Global Brain Health Institute, University of California, San Francisco,  
104 United States, <sup>65</sup>Laboratorio de Genética. Hospital Universitario Central de Asturias, Oviedo, Spain,

105 <sup>66</sup>Alzheimer's disease and other cognitive disorders unit. Neurology Service, Hospital Clínic, Fundació de  
106 Recerca Clínic Barcelona-Institut d'Investigacions Biomediques August Pi i Sunyer (FRCB-IDIBAPS),  
107 University of Barcelona, Barcelona, Spain, <sup>67</sup>Departamento de Medicina, Facultad de Medicina,  
108 Universidad de Sevilla, Spain, <sup>68</sup>Department of Neurology, II B Sant Pau, Hospital de la Santa Creu i Sant  
109 Pau, Universitat Autònoma de Barcelona, Barcelona, Spain, <sup>69</sup>Centro de Biología Molecular Severo  
110 Ochoa (UAM-CSIC), <sup>70</sup>Universidad Autónoma de Madrid, <sup>71</sup>Alzheimer's Centre Reina Sofia-CIEN  
111 Foundation-ISCIII, 28031 Madrid, Spain, <sup>72</sup>Glenn Biggs Institute for Alzheimer's & Neurodegenerative  
112 Diseases, University of Texas Health Science Center at San Antonio, San Antonio, TX, USA

## 113 **Abstract**

114 **We conducted the largest PSP GWAS of the Iberian population to date (522 cases from 22**  
115 **Spanish and Portuguese institutions). We independently replicated seven known PSP risk**  
116 **variants, and unveiled a novel locus in *NFASC/CNTN2* after meta-analysing our results with**  
117 **a newly available Dutch cohort and publicly available summary statistics. These findings**  
118 **highlight the importance of neuron-oligodendrocyte interactions in PSP etiopathology.**

## 119 **Main**

120 Progressive supranuclear palsy (PSP) is a proteinopathy neuropathologically defined by intra-  
121 neuronal and intra-glial aggregations of 4-repeat microtubule associated *tau* and clinically  
122 expressed as several phenotypes with different combinations of oculomotor, parkinsonian, bulbar,  
123 cognitive, and behavioural features<sup>1</sup>. The common allele of an ancestral 900 kb inversion, known  
124 as the *MAPT* H1 haplotype, is the most important genetic risk factor for sporadic PSP, causing a  
125 5.5-fold increase in PSP risk compared to the alternative *MAPT* H2 haplotype<sup>2</sup>. Importantly, the  
126 low prevalence of PSP conditions the scarcity of genome-wide association studies (GWAS), with  
127 only eight genetic risk loci reported to date<sup>3-5</sup>. Elucidating the genetic component of PSP could  
128 lead to early and improved diagnosis, identification of pathophysiological biomarkers and novel  
129 therapeutic treatments.

130 The PSP/DEGESCO cohort consists of clinical (N=327) and histopathological (N=195) PSP  
131 subjects from Spain and Portugal (Supplementary Table 1), genotyped using the Affymetrix 815K  
132 Spanish Biobank Array (Thermo Fisher). We leveraged our previous cohort,  
133 GR@ACE/DEGESCO<sup>6</sup>, to select our controls (N=1950). Since cases and controls were  
134 genotyped by the same platform and sequencing centre, we performed joint calling, quality  
135 control (QC) and TOPMed imputation<sup>7</sup> of our genomic data, following standard procedures  
136 (Supplementary Information, Extended data Fig. 1). Clinical cases fulfilling the Movement  
137 Disorder Society (MDS) criteria for probable PSP<sup>8</sup> were initially selected for our study, allowing  
138 the inclusion of atypical PSP phenotypes. However, we observed that atypical cases had a  
139 decreased *MAPT* H1 burden compared to those with histopathological confirmation ( $\chi^2=6.29$ ;  
140  $DF=1$ ;  $p=0.01$ ), and that other known PSP genetic risk factors also showed weaker associations  
141 with disease status in atypical cases compared to those with Richardson's syndrome (PSP-RS) or

142 histopathological confirmation (Supplementary Information), indicating the presence of  
143 phenotypic heterogeneity in our non-Richardson clinical cases (nR-PSP). As increasing the  
144 sample size in detriment of phenotypic accuracy can undermine the detection of small effect  
145 variants in GWAS studies<sup>9</sup>, we decided to keep only PSP-RS and histopathologically confirmed  
146 cases for further analysis.

147 We ran PC-adjusted case-control genome wide associations (~9M common genetic variants) for  
148 our three subcohorts of Spanish and Portuguese ancestry (Extended Data Table 2), and meta-  
149 analyzed these results using a common effects inverse variance-weighted fixed-effect approach.  
150 We detected a strong genome-wide significant (GWS) signal (Fig. 1) for the well-known PSP-  
151 risk *MAPT* H1 haplotype (rs8070723 A:  $OR[95\%CI]=4.02[3.12-5.19]$ ;  $p=9.89 \cdot 10^{-27}$ ), and  
152 replicated six additional PSP susceptibility *loci* in our study, showing consistent effect directions  
153 with previous reports (Extended Data Table 3): *MOBP* (rs1768208 G:  $OR[95\%CI]=0.76[0.64-$   
154  $0.89]$ ;  $p=2.49 \cdot 10^{-04}$ ), *EIF2AK3* (rs7571971 C:  $OR[95\%CI]=0.80[0.68-0.95]$ ;  $p=9.06 \cdot 10^{-03}$ ), *STX6*  
155 (rs1411478 G:  $OR[95\%CI]=0.84[0.71-0.98]$ ;  $p=0.03$ ), *SLCO1A2* (rs11568563 A:  
156  $OR[95\%CI]=0.54[0.42-0.69]$ ;  $p=1.17 \cdot 10^{-06}$ ), and *DUSP10* (rs6687758 A:  
157  $OR[95\%CI]=0.80[0.66-0.97]$ ;  $p=0.02$ ). After adjusting by the *MAPT* H1 haplotypic background,  
158 we also reproduced an additional independent signal within the *MAPT* locus, which partially tags  
159 the PSP risk H1c subhaplotype, (rs242557 G:  $OR[95\%CI]=0.72[0.61-0.86]$ ;  $p=2.49 \cdot 10^{-04}$ ).  
160 However, the effect of the GWS *RUNX2* locus, reported by Chen *et al.*<sup>5</sup>, was not significant in  
161 our analysis (rs6458446 A:  $OR[95\%CI]=0.90[0.75-1.09]$ ;  $p=0.27$ ). Additionally, a recent  
162 preprint study<sup>10</sup> reported a GWS signal in the *APOE* locus where *APOE*  $\epsilon 4$  was the protective  
163 allele and *APOE*  $\epsilon 2$  was the risk allele. In our study, we replicated the described *APOE*  $\epsilon 4$   
164 protective effect (rs429358 C:  $OR[95\%CI]=0.72[0.53-0.96]$ ;  $p=0.02$ ), but *APOE*  $\epsilon 2$  was not  
165 significant (rs7412 T:  $OR[95\%CI]=1.08[0.78-1.49]$ ;  $p=0.64$ ). Whether a protective mechanism  
166 for *APOE*  $\epsilon 4$ , the most important genetic risk factor for sporadic AD, exists in PSP, or this effect  
167 is caused by a selection bias favouring inclusion of cases without amyloid pathology needs to be  
168 clearly established in future studies. Finally, the *TNXB/C4A* locus, described by another recent  
169 preprint article<sup>11</sup>, was not replicated (rs369580 G:  $OR[95\%CI]=1.25[0.86-1.82]$ ;  $p=0.24$ ),  
170 although its effect direction was concordant in our cohort.

171 Aiming to find novel PSP associations, we conducted a meta-analysis of our Spanish and  
172 Portuguese cohort with the results of the Sanchez-Contreras *et al.* study<sup>4</sup>, the largest publicly  
173 available summary statistics for PSP genetics, and an additional dataset including 59 clinical PSP-  
174 RS subjects and 1513 controls provided by the Amsterdam Dementia Cohort, totally comprising  
175 3099 PSP and 11482 controls (Extended Data Table 4). An important limitation of this approach  
176 was that, due to the design of the previous studies<sup>3,4</sup>, only 36 SNPs were available for meta-  
177 analysis. We found a novel GWS association of the *NFASC* locus (rs12744678 C:  $OR[95\%$



178  $CIJ=0.83[0.78-0.89]$ ;  $p=4.15 \cdot 10^{-08}$ ), which had null heterogeneity across cohorts ( $I^2=0\%$ ), and  
179 showed concordant effect directions in all groups (Fig. 2, Extended Data Table 5). The *NFASC*  
180 gene encodes the neurofascin proteins and is highly expressed by neurons and oligodendrocytes.  
181 These proteins are involved in the development of axon initial segments and nodes of Ranvier in  
182 the central (CNS) and peripheral nervous system (PNS) by forming paranodal junctions, a very  
183 specialized cell-cell adhesion complex that is essential for correct myelination and impulse  
184 conduction<sup>12,13</sup>. Moreover, mutations in *NFASC* have been linked to neurodevelopmental  
185 disorders with central and peripheral motor dysfunction [61], and anti-neurofascin antibodies are  
186 found in a fraction of patients with CNS and PNS demyelinating diseases, such as multiple  
187 sclerosis<sup>14</sup>. Interestingly, although we did not find any significant QTLs for this variant, we found  
188 that rs4951151, the top variant on the locus (Fig. 2), is an eQTL for the neighbouring gene *CNTN2*  
189 in cerebellar tissue (on GTEx <https://gtexportal.org/>), and a pQTL for *CNTN2* in CSF and plasma  
190 (1:205001174-T-C, on ONTIME <https://ontime.wustl.edu/>)<sup>15</sup>. Importantly, *CNTN2* is almost  
191 exclusively expressed by oligodendrocytes and is highly coexpressed with *MOBP* and *SLCO1A2*,  
192 two known PSP susceptibility loci (Extended Data Fig. 3). These three genes belong to the same  
193 expression cluster, which is implicated in myelination and enriched in this specific cell type  
194 (Extended Data Fig. 3). *CNTN2* encodes contactin-2 a transmembrane protein also implicated in  
195 the organization of nodes of Ranvier at the juxtaparanodal junctions. A study observed that the  
196 absence of this protein can impair oligodendrocyte function and axonal conduction, although it  
197 did not affect myelination under pathological conditions<sup>16</sup>.

198 The finding of the novel *NFASC/CNTN2* locus, along with other replicated loci, such as *MOBP*,  
199 *SLCO1A2* and *DUSP10*, highlight the importance of myelination and oligodendrocyte-neuron  
200 interactions in PSP etiopathology: *MOBP* encodes the myelin-associated oligodendrocyte basic  
201 protein, a vital protein for myelin sheath structural integrity and maintenance in the central  
202 nervous system, *SLCO1A2* is highly expressed in the brain, almost exclusively by  
203 oligodendrocytes, and is highly correlated to the oligodendrocytes myelination expression  
204 cluster<sup>17</sup>, and *DUSP10* is highly expressed in oligodendrocytes and inhibitory neurons, encoding  
205 a phosphatase involved in MAP kinases inactivation which is able to induce oligodendrocyte  
206 differentiation (Extended Data Fig. 4)<sup>18</sup>. Gene ontology enrichment, including the PSP genes we  
207 replicated and the novel *NFASC* locus, reveals biological features related to myelination and axon  
208 ensheathment (Extended Data Table 6). Moreover, coexpression network analysis revealed that  
209 *MARK1*, encoding the microtubule affinity regulating kinase 1, a kinase capable of  
210 phosphorylating tau promoting microtubule destabilisation<sup>19</sup>, is highly coexpressed with *MOBP*,  
211 *SLCO1A2* and *NFASC* (Extended Data Fig. 5). Furthermore, a recent, preprint GWAS has also  
212 found that several PSP risk variants have oligodendrocyte-specific effects on gene expression<sup>11</sup>.  
213 Oligodendrocytes have a prominent microtubule structure and express *tau*, which plays a role in

214 early contact initiation in axons, maintaining microtubule stability and myelination<sup>20</sup>. Moreover,  
215 tau pathology, which is predominantly neuronal in AD, is commonly found in white matter  
216 oligodendrocytes in PSP and other tauopathies<sup>20</sup>, and deregulation of myelination processes has  
217 been linked to neurodegenerative diseases, with a special emphasis on PSP<sup>21</sup>. Overall, genetic  
218 findings suggest that oligodendrocyte dysfunction and impaired myelination may play a  
219 significant role in the etiopathogenesis of PSP. Additionally, there is increasing evidence  
220 suggesting astrocytic tau pathology occurs in the earliest stages of corticobasal degeneration and  
221 PSP<sup>22,23</sup>. This points to a paradigm shift from neuronal to glial cell involvement in early 4-repeat  
222 tau pathology.

223 Of note, a small overlap may exist between our samples and some of those present in the GWAS  
224 by Höglinger *et al*<sup>3</sup>, as 23 cases in the former study were recruited by Spanish centres. However,  
225 this potential overlap comprises a very small fraction of the samples included in both datasets,  
226 thus we do not expect it to substantially bias our results. In fact, PSP GWASs suffer from a  
227 considerable “Russian doll” effect<sup>9</sup>, as new reports consist of expansions on previously available  
228 cohorts, causing a large overlap between studies. Our study used exclusively Spanish and  
229 Portuguese samples for validation of PSP susceptibility loci, and thus provides a highly  
230 independent cohort for replication of the previously reported variants (Extended Data Table 3).  
231 Importantly, there is a striking lack of diversity in PSP genetic studies to date. Expanding future  
232 studies to include non-European populations is crucial for a better understanding of the disease  
233 etiology, enhancing genetic discovery and benefiting a broader range of the human population<sup>24</sup>.

## 234 **References**

- 235 1. Boxer, A. L. *et al.* Advances in progressive supranuclear palsy: new diagnostic criteria,  
236 biomarkers, and therapeutic approaches. *The Lancet Neurology* **16**, 552–563 (2017).
- 237 2. Baker, M. *et al.* Association of an Extended Haplotype in the Tau Gene with Progressive  
238 Supranuclear Palsy. *Human Molecular Genetics* **8**, 711–715 (1999).
- 239 3. PSP Genetics Study Group *et al.* Identification of common variants influencing risk of the  
240 tauopathy progressive supranuclear palsy. *Nat Genet* **43**, 699–705 (2011).
- 241 4. Sanchez-Contreras, M. Y. *et al.* Replication of progressive supranuclear palsy genome-wide  
242 association study identifies SLCO1A2 and DUSP10 as new susceptibility loci. *Mol*  
243 *Neurodegeneration* **13**, 37 (2018).

- 244 5. Chen, J. A. *et al.* Joint genome-wide association study of progressive supranuclear palsy  
245 identifies novel susceptibility loci and genetic correlation to neurodegenerative diseases. *Mol*  
246 *Neurodegeneration* **13**, 41 (2018).
- 247 6. Rojas, I. de *et al.* Common variants in Alzheimer’s disease and risk stratification by  
248 polygenic risk scores. *Nature Communications* **12**, 3417 (2021).
- 249 7. Taliun, D. *et al.* Sequencing of 53,831 diverse genomes from the NHLBI TOPMed Program.  
250 *Nature* **590**, 290–299 (2021).
- 251 8. Höglinger, G. U. *et al.* Clinical diagnosis of progressive supranuclear palsy: The movement  
252 disorder society criteria: MDS Clinical Diagnostic Criteria for PSP. *Mov Disord.* **32**, 853–  
253 864 (2017).
- 254 9. Escott-Price, V. & Hardy, J. Genome-wide association studies for Alzheimer’s disease:  
255 bigger is not always better. *Brain Communications* **4**, fcac125 (2022).
- 256 10. Wang, H. *et al.* Whole-Genome Sequencing Analysis Reveals New Susceptibility Loci  
257 and Structural Variants Associated with Progressive Supranuclear Palsy. Preprint at  
258 <http://medrxiv.org/lookup/doi/10.1101/2023.12.28.23300612> (2023).
- 259 11. Farrell, K. *et al.* Genetic, Transcriptomic, Histological, and Biochemical Analysis of  
260 Progressive Supranuclear Palsy Implicates Glial Activation and Novel Risk Genes. Preprint  
261 at <http://biorxiv.org/lookup/doi/10.1101/2023.11.09.565552> (2023).
- 262 12. Sherman, D. L. *et al.* Neurofascins Are Required to Establish Axonal Domains for  
263 Saltatory Conduction. *Neuron* **48**, 737–742 (2005).
- 264 13. Zhang, A. *et al.* Neurofascin 140 Is an Embryonic Neuronal Neurofascin Isoform That  
265 Promotes the Assembly of the Node of Ranvier. *J. Neurosci.* **35**, 2246–2254 (2015).
- 266 14. Kira, J., Yamasaki, R. & Ogata, H. Anti-neurofascin autoantibody and demyelination.  
267 *Neurochemistry International* **130**, 104360 (2019).
- 268 15. Yang, C. *et al.* Genomic atlas of the proteome from brain, CSF and plasma prioritizes  
269 proteins implicated in neurological disorders. *Nat Neurosci* **24**, 1302–1312 (2021).
- 270 16. Zoupi, L. *et al.* The function of contactin-2/TAG-1 in oligodendrocytes in health and  
271 demyelinating pathology. *Glia* **66**, 576–591 (2018).

- 272 17. Sjöstedt, E. *et al.* An atlas of the protein-coding genes in the human, pig, and mouse  
273 brain. *Science* **367**, eaay5947 (2020).
- 274 18. Gobert, R. P. *et al.* Convergent functional genomics of oligodendrocyte differentiation  
275 identifies multiple autoinhibitory signaling circuits. *Mol Cell Biol* **29**, 1538–1553 (2009).
- 276 19. Gu, G. J. *et al.* Role of Individual MARK Isoforms in Phosphorylation of Tau at Ser262  
277 in Alzheimer’s Disease. *Neuromol Med* **15**, 458–469 (2013).
- 278 20. Kahlson, M. A. & Colodner, K. J. Glial Tau Pathology in Tauopathies: Functional  
279 Consequences. *J Exp Neurosci* **9s2**, JEN.S25515 (2015).
- 280 21. Allen, M. *et al.* Conserved brain myelination networks are altered in Alzheimer’s and  
281 other neurodegenerative diseases. *Alzheimer’s & Dementia* **14**, 352–366 (2018).
- 282 22. Briel, N., Pratsch, K., Roeber, S., Arzberger, T. & Herms, J. Contribution of the  
283 astrocytic tau pathology to synapse loss in progressive supranuclear palsy and corticobasal  
284 degeneration. *Brain Pathology* **31**, e12914 (2021).
- 285 23. Ling, H. *et al.* Astrogliopathy predominates the earliest stage of corticobasal  
286 degeneration pathology. *Brain* **139**, 3237–3252 (2016).
- 287 24. Graham, S. E. *et al.* The power of genetic diversity in genome-wide association studies  
288 of lipids. *Nature* **600**, 675–679 (2021).



289 **Figures**

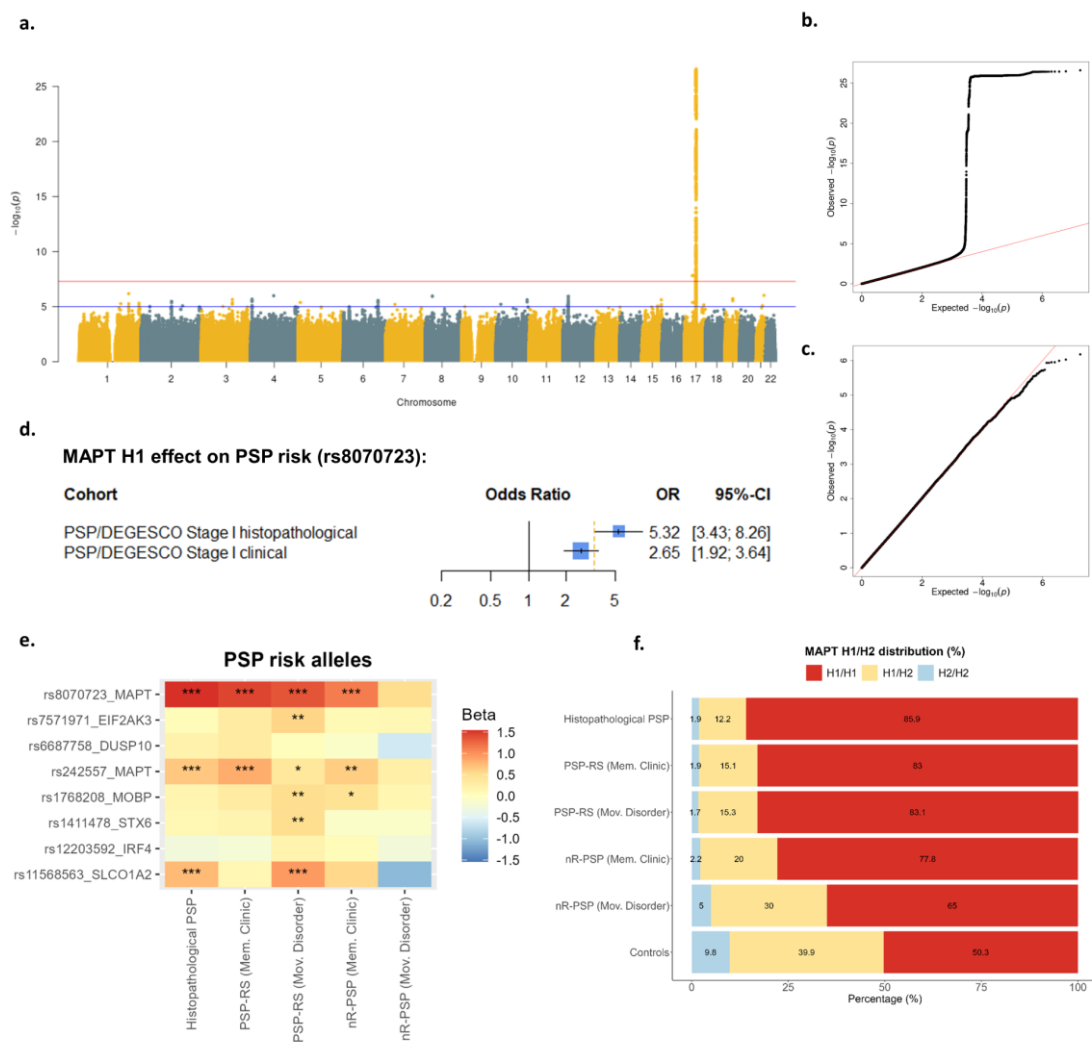

290

291 **Fig. 1. PSP GWAS in the Spanish and Portuguese population and evaluation of the clinical**  
 292 **subgroups. a.** Manhattan plot displaying PC-adjusted PSP genome-wide associations of common  
 293 variants. **b-c.** QQ-plots displaying expected vs. observed p-values in our PSP GWAS including  
 294 and excluding chr17, respectively. **d.** Forest plot displaying effects of rs8070723, a variant tagging  
 295 the *MAPT* H1 haplotype in our histopathological and clinical Stage I samples. **e.** Effect sizes and  
 296 significance of the risk allele of known reported PSP risk variants, as reported by Sanchez-  
 297 Contreras *et al*<sup>4</sup> **f.** Distribution of *MAPT* H1/H2 haplotypes in the different groups. OR, odds  
 298 ratio; PSP-RS, Richardson-Syndrome; nR-PSP, non-Richardson PSP.

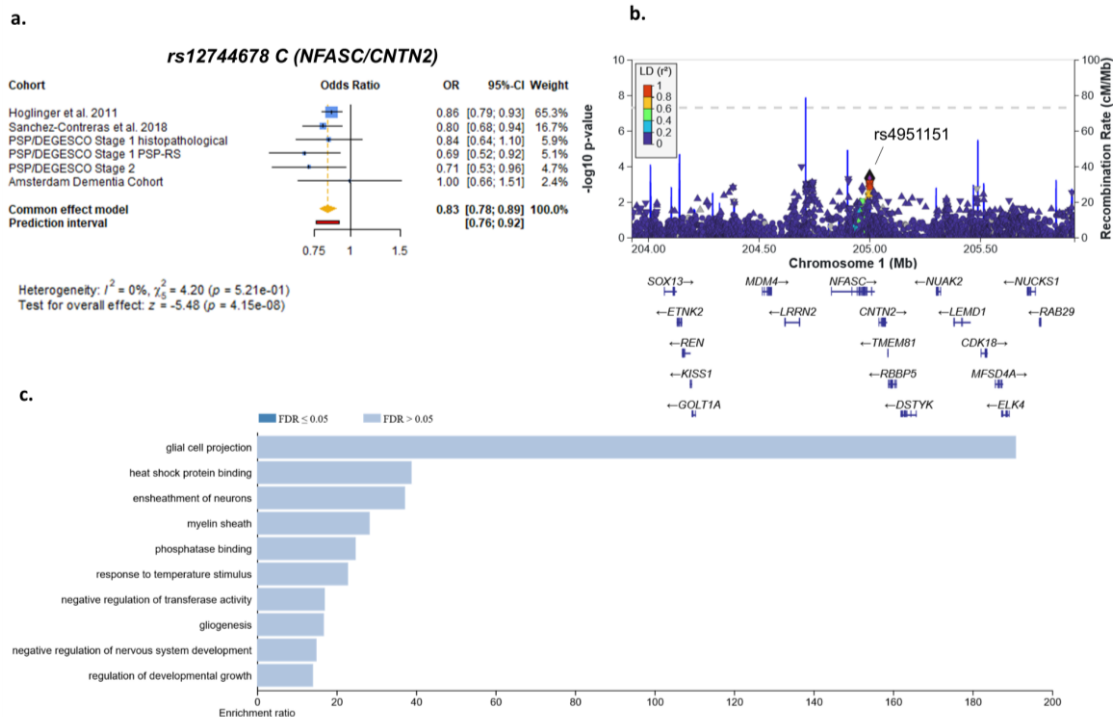

299

300 **Fig. 2. NFASC/CNTN2 is a novel locus for progressive supranuclear palsy.** **a.** Forest plot  
 301 displaying effect sizes and meta-analysis of the rs12744678 C allele among the different cohorts.  
 302 **b.** Locus plot of the *NFASC/CNTN2* in cohorts where genome-wide association results were  
 303 available (PSP/DEGESCO and ADC). **c.** Gene ontology enrichment ratio calculated using  
 304 WebGestalt including PSP replicated loci (*MAPT*, *MOBP*, *EIF2AK3*, *STX6*, *DUSP10*, *SLCO1A2*)  
 305 and the novel *NFASC* locus.

## 306 **Online methods**

### 307 **PSP/DEGESCO cohort**

308 Stage I samples consisted of 176 histopathologically confirmed PSP samples recruited between  
309 2002 and 2021 from Spanish and Portuguese brain biobanks, and 312 samples fulfilling a clinical  
310 diagnosis of probable PSP provided by research groups linked to DEGESCO (Supplementary  
311 Table 1). Neuropathological diagnosis of PSP was assessed based on the distribution of  
312 neurofibrillary tangles in the brain, according to National Institute of Neurological Disorders and  
313 Stroke (NINDS) criteria<sup>25</sup>, while clinical diagnosis was based on the Movement Disorder Society  
314 criteria<sup>8</sup>. Briefly, neurologists evaluated four functional domains: ocular motor dysfunction,  
315 postural instability, akinesia and cognitive dysfunction. Considering these four domains a  
316 probable PSP diagnosis can be assigned to not only patients with PSP-RS, but also to those  
317 individuals with atypical clinical presentations, such as PSP with progressive gait freezing, with  
318 predominant parkinsonism or with predominant frontal presentation. Controls in this study were  
319 obtained from the GR@ACE/DEGESCO cohort (Supplementary Information)<sup>6</sup>. Finally, we  
320 recruited an additional batch of PSP samples for further validation of our results (PSP/DEGESCO  
321 Stage II), which included 39 histopathological and 154 clinical samples (Supplementary Table 1).  
322 Written informed consent was obtained from all participants in this study. This study has been  
323 approved by the competent research ethical committee (MED-FACE-2020-01, Universidad  
324 Internacional de Catalunya, Sant Cugat del Vallés, Spain).

### 325 **Amsterdam Dementia Cohort**

326 Patient records of 397 patients diagnosed with PSP and/or corticobasal degeneration within the  
327 Amsterdam Dementia Cohort (ADC) between 2000 and 2023 were retrieved<sup>26</sup>. A clinician  
328 retrospectively evaluated each patient file, according the Movement Disorder Society criteria<sup>8</sup>,  
329 for ocular motor dysfunction, postural instability, akinesia and cognitive dysfunction. For this  
330 study, a total of 59 patients had genotyping available, were unrelated and of European ancestry,  
331 and met criteria for PSP-RS. Controls were patients without cognitive complaints from the same  
332 cohort (N=1105) and cognitively normal individuals from various other studies: one twin from  
333 each pair of twins from the EPAD study<sup>27</sup> (N=97), partners of children of participants from the  
334 100-plus Study<sup>28</sup> (N=83) and controls included in the context of the Parelsnoer Institute<sup>29</sup>  
335 (N=228). The local Medical Ethics Committees have approved the protocols for the ADC and the  
336 other studies and all participants of the ADC provided written informed consent.

### 337 **PSP/DEGESCO: DNA genotyping, QC & imputation**

338 DNA from PSP cases was genotyped by the Spanish National Center for Genotyping (CEGEN)  
339 using the Axiom 815K Spanish Biobank Array (Thermo Fisher). We performed genotype calling

340 using Affymetrix power tools (APT) software v1.15.0, and curated calls following the Axiom  
341 data analysis workflow. To improve calling accuracy we combined our cases with 5000 controls  
342 genotyped in the same center and using the same platform from the GR@ACE/DEGESCO  
343 cohort<sup>6,30</sup>. Called variants passing quality control (QC) criteria defined by the manufacturer  
344 (Affymetrix) were kept for downstream analysis (N=737,174). After genotype calling, we  
345 removed samples with low genotype call rates (<97%), high heterozygosity (+3SD over mean  
346 heterozygosity), discordant genetic-reported sex, and non-European ancestry, based on the 1000G  
347 European population cluster. After sample QC, we removed variants with high missingness  
348 (>5%), low frequency (MAF<0.01), differential missingness between cases and controls ( $p<10^{-5}$ )  
349 or failing the Hardy Weinberg equilibrium test ( $p<10^{-6}$ ) in the control population. Samples with  
350 genotype call rates below 0.97 after variant QC were also removed. Additionally, we excluded  
351 duplicated and related individuals within our study by applying a GENESIS<sup>31</sup> kinship filter of  
352 0.046875. For PSP/DEGESCO Stage II samples, we merged the controls and cases passing QC  
353 from Stage I during the genotype calling stage and followed the same procedure described above.  
354 Additionally, at the IBD filtering step we removed Stage II cases overlapping or related to cases  
355 from Stage I. A complete overview of the QC process is detailed at the Supplementary  
356 Information section.

### 357 **Amsterdam Dementia Cohort: genotyping, QC and imputation**

358 We genotyped individuals using the Illumina Global Screening Array and applied established  
359 quality control methods<sup>32</sup>. We used high-quality genotypes in all individuals (individual call rate  
360 >99%, variant call rate >99%), individuals with sex mismatches were excluded and departure  
361 from Hardy-Weinberg equilibrium was considered significant at  $p<1\times 10^{-6}$ . Genotypes were then  
362 lifted over to GRCh38 and prepared for imputation using provided scripts (HRC-1000G-check-  
363 bim.pl) specifying TOPMed as reference panel. This script compares variant ID, strand, and allele  
364 frequencies to the TOPMed reference panel (version r2, N=194,512 haplotypes from N=97,256  
365 individuals)<sup>7</sup>. Finally, all variants were submitted to the Michigan Imputation server  
366 (<https://imputation.biodatacatalyst.nih.gov/>). The server uses EAGLE (v2.4) to phase data  
367 and Minimac4 to perform genotype imputation to the reference panel. After quality control and  
368 genotype imputation of the genetic data, we kept only individuals of European ancestry (based on  
369 1000Genomes clustering)<sup>33</sup>, and excluded individuals with a family relation (identity-by-descent  
370  $\geq 0.2$ )<sup>34</sup>, leaving 59 clinically diagnosed PSP-RS cases and 1513 controls for analysis.

### 371 **Statistical analysis**

372 For GWAS analysis, we included approximately four sex-matched controls per PSP case  
373 available (Extended Data Table 2), as the increase in statistical power above this control-to-case  
374 ratio is generally negligible<sup>35</sup>. We removed rare SNPs (MAF<0.01) or those with low imputation

375 quality ( $R^2 < 0.3$ ), leaving us with ~9M variants for association testing. To test the association of  
376 SNP allele dosages with PSP risk we fitted logistic regression models using PLINK v2.00a3.7LM  
377 software. We adjusted the models by the first four PCs to account for population microstructure.  
378 As we used population-based controls in our analysis, we did not adjust the models by age to  
379 avoid jeopardizing small effects, since the large age differences between cases and controls would  
380 lead to adjustment for ‘caseness’, biasing the analysis towards the null<sup>36</sup>. In addition, to ensure  
381 that the association of tested variants was not age-driven, we ran PC-adjusted linear regressions  
382 for age in the full subset (N=1,450) of Stage I controls (Supplementary Table 2). Additionally, to  
383 check for H1/H2 independent associations around the *MAPT* gene, we ran models adjusted by the  
384 rs1122380 genotype, which is in full linkage disequilibrium (LD) with rs1800547 (CEU:  
385  $R^2 = 1.00$ ;  $D' = 1.00$ ), the SNP previously used to report *MAPT* H1/H2 haplotype effects in our  
386 population<sup>37</sup>. We performed fixed effect inverse variance-weighted meta-analysis of the discovery  
387 and replication sets using the METAL software<sup>38</sup>. Locus association plots were made using  
388 LocusZoom (<http://locuszoom.org/>). All additional analyses, processing and visual representation  
389 of the data were performed using R software v4.1.1. We strand corrected and flipped effect alleles  
390 to align our results with the previous ones when needed and used the meta R package<sup>39</sup> to run  
391 fixed effect inverse variance-weighted meta-analysis on specific SNPs.

### 392 **In-silico functional analysis**

393 Enrichment analysis was performed using WebGestalt<sup>40</sup> (<https://www.webgestalt.org/>).  
394 Expression of target genes was assessed using GTEx Portal and Human Protein Atlas for RNA  
395 and protein levels, respectively. The Online Neurodegenerative Trait Integrative Multi-Omics  
396 Explorer (ONTIME) web resource was accessed to check association of variants with quantitative  
397 endophenotypes<sup>15</sup>. Finally, gene co-expression networks were generated using GeneFriends  
398 (<https://www.genefriends.org/>)<sup>41</sup>. Details on these methodologies are provided in the  
399 Supplementary Information.

### 400 **Data availability**

401 The data that support the findings of this study are not openly available due to reasons of  
402 sensitivity and are available from the corresponding author upon reasonable request. Summary  
403 statistics detailing association results will be made publicly available upon acceptance of the  
404 manuscript.

### 405 **Code availability**

406 Custom code was used to calculate polygenic risk scores and is publicly available  
407 ([https://github.com/Pablo-GarGon/PRS\\_Generator](https://github.com/Pablo-GarGon/PRS_Generator)). Other analyses were performed using



408 publicly available software, tools and algorithms, as detailed in the Methods and Supplementary  
409 Information sections.

## 410 **References**

- 411 25. Hauw, J.-J. *et al.* Preliminary NINDS neuropathologic criteria for Steele-Richardson-  
412 Olszewski syndrome (progressive supranuclear palsy). *Neurology* **44**, 2015–2015 (1994).
- 413 26. Van Der Flier, W. M. & Scheltens, P. Amsterdam Dementia Cohort: Performing  
414 Research to Optimize Care. *JAD* **62**, 1091–1111 (2018).
- 415 27. Konijnenberg, E. *et al.* The EMIF-AD PreclinAD study: study design and baseline  
416 cohort overview. *Alz Res Therapy* **10**, 75 (2018).
- 417 28. Holstege, H. *et al.* The 100-plus Study of cognitively healthy centenarians: rationale,  
418 design and cohort description. *Eur J Epidemiol* **33**, 1229–1249 (2018).
- 419 29. Jansen, I. E. *et al.* Genome-wide meta-analysis for Alzheimer’s disease cerebrospinal  
420 fluid biomarkers. *Acta Neuropathol* **144**, 821–842 (2022).
- 421 30. Moreno-Grau, S. *et al.* Genome-wide association analysis of dementia and its clinical  
422 endophenotypes reveal novel loci associated with Alzheimer’s disease and three causality  
423 networks: The GR@ACE project. *Alzheimer’s & Dementia* **15**, 1333–1347 (2019).
- 424 31. Gogarten, S. M. *et al.* Genetic association testing using the GENESIS R/Bioconductor  
425 package. *Bioinformatics* **35**, 5346–5348 (2019).
- 426 32. Das, S. *et al.* Next-generation genotype imputation service and methods. *Nat Genet* **48**,  
427 1284–1287 (2016).
- 428 33. The 1000 Genomes Project Consortium *et al.* A global reference for human genetic  
429 variation. *Nature* **526**, 68–74 (2015).
- 430 34. Anderson, C. A. *et al.* Data quality control in genetic case-control association studies.  
431 *Nature Protocols* **5**, 1564–1573 (2011).
- 432 35. Taylor, J. M. Choosing the number of controls in a matched case-control study, some  
433 sample size, power and efficiency considerations. *Stat Med* **5**, 29–36 (1986).
- 434 36. Baker, E. *et al.* What does heritability of Alzheimer’s disease represent? *PLoS ONE* **18**,  
435 e0281440 (2023).

- 436 37. Sánchez-Juan, P. *et al.* The MAPT H1 Haplotype Is a Risk Factor for Alzheimer's  
437 Disease in APOE  $\epsilon$ 4 Non-carriers. *Front. Aging Neurosci.* **11**, 327 (2019).
- 438 38. Willer, C. J., Li, Y. & Abecasis, G. R. METAL: fast and efficient meta-analysis of  
439 genomewide association scans. *Bioinformatics* **26**, 2190–2191 (2010).
- 440 39. Balduzzi, S., Rücker, G. & Schwarzer, G. How to perform a meta-analysis with R: a  
441 practical tutorial. *Evid Based Mental Health* **22**, 153–160 (2019).
- 442 40. Wang, J., Vasaikar, S., Shi, Z., Greer, M. & Zhang, B. WebGestalt 2017: a more  
443 comprehensive, powerful, flexible and interactive gene set enrichment analysis toolkit.  
444 *Nucleic Acids Research* **45**, W130–W137 (2017).
- 445 41. Raina, P. *et al.* GeneFriends: gene co-expression databases and tools for humans and  
446 model organisms. *Nucleic Acids Research* **51**, D145–D158 (2023).

## 447 Acknowledgements

448 The present work has been performed as part of the Doctoral thesis of Pablo García-González at  
449 the University of Barcelona (Barcelona, Spain). We would like to thank patients and controls who  
450 participated in this project. Some control samples and data from patients included in this study  
451 were provided in part by the National DNA Bank Carlos III ([www.bancoadn.org](http://www.bancoadn.org), University of  
452 Salamanca, Spain) and Hospital Universitario Virgen de Valme (Sevilla, Spain); they were  
453 processed following standard operating procedures with the appropriate approval of the Ethical  
454 and Scientific Committee. We are grateful to the Biomedic Diagnostic Center (CBD) of the  
455 Hospital Clinic de Barcelona for access to, and assistance with, FLUOSTAR Omega equipment  
456 and RT-QuIC experiments (Drs. Raquel Ruiz and Laura Naranco). Hospital Clinic de Barcelona  
457 receives support from the CERCA programme from Generalitat de Catalunya (Catalan  
458 government). Several authors of this manuscript are members of the European Reference Network  
459 for Rare Neurological Diseases - Project ID No 739510, as well as CIBERNED (CB06/05/0018-  
460 ISCIII). We acknowledge the Biobank of the University of Navarra for its collaboration. We  
461 thank all study participants and all personnel involved in data collection for the contributing  
462 studies. Research of Alzheimer Center Amsterdam is part of the neurodegeneration research  
463 program of Amsterdam Neuroscience. Alzheimer Center Amsterdam is supported by Stichting  
464 Alzheimer Nederland and Stichting Steun Alzheimercentrum Amsterdam. The chair of Wiesje  
465 van der Flier is supported by the Pasman stichting. The clinical database structure was developed  
466 with funding from Stichting Dioraphte. The work in this manuscript was carried out on the  
467 Snellius supercomputer, which is embedded in the Dutch national e-infrastructure with the  
468 support of SURF Cooperative. Computing hours were granted in 2016, 2017, 2018 and 2019 to  
469 H. Holstege by the Dutch Research Council (project name: ‘100plus’; project numbers 15318 and  
470 17232). Samples and data from patients included in this study were provided by the Vall d’Hebron  
471 University Hospital Biobank (PT20/00107), integrated in the Spanish National Biobanks  
472 Network, and they were processed following standard operating procedures with the appropriate  
473 approval of the Ethical and Scientific Committees. We are indebted to the Biobank-Hospital  
474 Clinic-FRCB-IDIBAPS for samples and data procurement. This work was funded by CIBERNED  
475 (Centro Investigación Biomédica en Red Enfermedades Neurodegenerativas) 10th internal call  
476 for cooperative projects (Register number: 2019/09). Agustín Ruiz, Pascual Sanchez-Juan,  
477 Alberto Rábano, and Maria J. Bullido received funding from this convocatory. Pablo García-  
478 González received support by CIBERNED employment plan CNV-304-PRF-866. CIBERNED is  
479 integrated into ISCIII (Instituto de Salud Carlos III). Mercé Boada, Marta Marquíé and Agustín  
480 Ruiz are also supported by national grants PI13/02434, PI16/01861, PI17/01474, PI19/01240.  
481 PI19/01301, PI19/00335 and PI22/011403, and CIBERNED grant 2019/08. The Genome  
482 Research @ Fundació ACE project (GR@ACE) is supported by Grifols SA, Fundació bancaria  
483 “La Caixa”, Fundació ACE, and CIBERNED. Acció Estratègica en Salut is integrated into the  
484 Spanish National R + D + I Plan and funded by ISCIII—Subdirección General de Evaluación and  
485 the Fondo Europeo de Desarrollo Regional (FEDER—“Una manera de hacer Europa”). Agustín  
486 Ruiz is supported by ISCIII national grant PMP22/00022, funded by the European Union  
487 (NextGenerationEU). The genotyping service to generate GR@ACE and PSP/DEGESCO GWAS  
488 data was carried out at CEGEN-PRB3-ISCIII; it is supported by grant PT17/0019, of the PE I+D+i  
489 2013-2016, funded by ISCIII and ERDF”. Itziar de Rojas received support by a national grant  
490 from ISCIII FI20/00215. Amanda Cano acknowledges the support of the Spanish Ministry of  
491 Science, Innovation and Universities under the grant Juan de la Cierva (FJC2018-036012-I), the  
492 support of ISCIII under the grant Sara Borrell (CD22/00125), Spanish Ministry of Science and  
493 Innovation, Proyectos de Generación de Conocimiento grant PID2021-122473OA-I00, and

494 Fundación ADEY under the program “Proyectos de Investigación en Salud 2023”. Fondo de  
495 Investigación en Salud (Instituto Carlos III) (PI17/00096) in the frame of the European Regional  
496 Development Fund (ERDF) and to Fundació la Marató de TV3 (PI043296 and 202009-10). This  
497 work was supported by the Spanish Ministry of Science and Innovation (RTC2019-007150-1),  
498 the Instituto de Salud Carlos III (ISCIII) and co-funded by the European Union (PI14/01823,  
499 PI16/01575, PI18/01898, PI19/01576, PI21/01875), the Consejería de Economía, Innovación,  
500 Ciencia y Empleo de la Junta de Andalucía (CVI-02526, CTS-7685, PY20\_00896), and the  
501 Consejería de Salud y Bienestar Social de la Junta de Andalucía (PI-0471-2013, PE-0210-2018,  
502 PI-0459-2018, PE-0186-2019). Pilar Gómez-Garre was supported by the “Nicolás Monardes”  
503 program (C-0048-2017) from Andalusian Regional Ministry of Health. Laura Muñoz-Delgado  
504 was supported by the “Río Hortega” program [CM21/00051] from the Instituto de Salud Carlos  
505 III (ISCIII-FEDER). The funders had no role in study design, data collection and analysis,  
506 decision to publish, or preparation of the manuscript. Sven J. van der Lee was funded for this  
507 study by NWO (#733050512, PROMO-GENODE: a PROspective study of MONoGENic causes  
508 Of Dementia) a substantial donation by Edwin Bouw Fonds and Dioraphte. SvdL further received  
509 funding for the GeneMINDS consortium, which is powered by Health~Holland, Top Sector Life  
510 Sciences & Health. Sven J. van der Lee is a recipient of ABOARD, which is a public-private  
511 partnership receiving funding from ZonMW (#73305095007) and Health~Holland, Topsector  
512 Life Sciences & Health (PPP-allowance; #LSHM20106). More than 30 partners participate in  
513 ABOARD. ABOARD also receives funding from Edwin Bouw Fonds and Gieskes-Strijbisfonds.  
514 ABOARD also receives funding from de Hersenstichting, Edwin Bouw Fonds and Gieskes-  
515 Strijbisfonds. Array genotyping was performed in the context of EADB (European Alzheimer  
516 DNA biobank) funded by the Jpco-fuND FP-829-029 (ZonMW projectnumber 733051061). This  
517 work has been supported by the Queen Sofia Foundation. Pascual Sánchez-Juan is supported by  
518 grants from ISCIII (PMP22/00022 and PI20/01011) and TED2021-131676B-100. Luis Miguel  
519 Real received support from “The absence of seroconversion after exposition to hepatitis C virus  
520 is not related to KIR-HLA genotype combinations” (GEHEP-012 study). Consejería de Salud de  
521 la Junta de Andalucía (grant number PI-0001/2017) and CIBERINFEC -Consortio Centro de  
522 Investigación Biomédica en Red de Enfermedades Infecciosas- Instituto de Salud Carlos III,  
523 Ministerio de Ciencia e Innovación y Unión Europea (Spain) (NextGeneration EU) (grant number  
524 CB21/13/00118). Jose Luis Royo received support from Project 23.04.2021 from Santángela  
525 Foundation (Sevilla, Spain).

## 526 **Contributions**

527 P.Gar-Gon. wrote the manuscript. Y.C., V.F., M.Bu., A.Ra., P.S-J., and A.Ru. jointly supervised  
528 the work. H.R.L., M.Bu., A.Ra., P.S-J., and A.Ru. designed and conceptualized the study. P.Gar-  
529 Gon., S.vdL., and M.H performed bioinformatics and statistical analyses. P.Gar-Gon., M.F.,  
530 S.vdL., I.dR., L.S., R.P., C.O., Y.P., I.Q., A.C., and H.H. were involved in data generation.  
531 H.R.L., Y.C., M.F., S.vdL., L.S., C.P., A.Cam., E.M., M.J.M., F.V., I. I-G., J.P., I. D-I., J, K, J.F.,  
532 A.Ll., S.CM.dB., Y.P., R.D-B., L.M-D., D.B-R., P.Gom-Gar., I.A., G.Ar., J.H.V., M.Me., J.P-T-  
533 , P.J.V., A.d.B., J.M.P., A.M.M., L.T., L.M.R., JL. R., M.E.E., C.G., D.C.T., M.B.E., B.S.M.,  
534 S.T.B., D.V.R., I.H., A.S-S., B.C-F., S.R.L., R.B.M., A.La., R.T., G.Am., E.M.S., M.F-M., C.L-  
535 M., V.A., L.M.P., H.H., P.M., O.B., and M.Bo. were involved in sample contribution. All authors  
536 critically revised the manuscript for important intellectual content and approved this final version.

537 **Competing interests**

538 Vigil Neuroscience and Prevail therapeutics are in a public-private partnership research program  
539 of Sven J. van der Lee. All funding is paid to his institution.



## Extended Data

**Extended Data Table 1.** Summary of samples remaining after QC steps in the PSP/DEGESCO cohort.

| <i>PSP/DEGESCO Stage I</i>  |            | <b>PSP</b>  |                 | <b>Controls</b> |             |                 |
|-----------------------------|------------|-------------|-----------------|-----------------|-------------|-----------------|
| <b>QC step:</b>             | <b>N</b>   | <b>Fail</b> | <b>Fail (%)</b> | <b>N</b>        | <b>Fail</b> | <b>Fail (%)</b> |
| <b>DNA QC</b>               | 488        | 88          | 18.03%          | NA              | NA          | NA              |
| <b>Calling</b>              | 400        | 8           | 2.00%           | 5000            | 26          | 0.52%           |
| <b>Heterozygosity</b>       | 392        | 3           | 0.77%           | 4974            | 4           | 0.08%           |
| <b>Sexcheck</b>             | 389        | 10          | 2.57%           | 4970            | 0           | 0.00%           |
| <b>PCA</b>                  | 379        | 6           | 1.58%           | 4970            | 15          | 0.30%           |
| <b>IBD</b>                  | 373        | 20          | 5.36%           | 4955            | 300         | 6.05%           |
| <b>FINAL</b>                | <b>353</b> |             |                 | <b>4655</b>     |             |                 |
| <i>PSP/DEGESCO Stage II</i> |            | <b>PSP</b>  |                 | <b>Controls</b> |             |                 |
| <b>QC step:</b>             | <b>N</b>   | <b>Fail</b> | <b>Fail (%)</b> | <b>N</b>        | <b>Fail</b> | <b>Fail (%)</b> |
| <b>DNA QC</b>               | 193        | 0           | 0.00%           | NA              | NA          | NA              |
| <b>Calling</b>              | 193        | 12          | 6.22%           | 5000            | 12          | 0.24%           |
| <b>Heterozygosity</b>       | 181        | 0           | 0.00%           | 4988            | 0           | 0.00%           |
| <b>Sexcheck</b>             | 181        | 1           | 0.55%           | 4988            | 0           | 0.00%           |
| <b>PCA</b>                  | 180        | 0           | 0.00%           | 4988            | 10          | 0.20%           |
| <b>IBD</b>                  | 180        | 11          | 6.11%           | 4978            | 302         | 6.07%           |
| <b>FINAL</b>                | <b>169</b> |             |                 | <b>4676</b>     |             |                 |
| N, sample size              |            |             |                 |                 |             |                 |

**Extended Data Table 2.** Demographic features of samples included in the Spanish and Portuguese PSP GWAS used for replication of previous known PSP *loci*.

|                                                | CA  |        |            | CO   |        |             |
|------------------------------------------------|-----|--------|------------|------|--------|-------------|
|                                                | N   | %Males | Age* (SD)  | N    | %Males | Age* (SD)   |
| <b>PSP/DEGESCO Stage I (histopathological)</b> | 156 | 56.4   | 76.5 (9.5) | 650  | 56.5   | 67.8 (10.1) |
| <b>PSP/DEGESCO Stage I (PSP-RS)</b>            | 112 | 48.2   | 67.2 (7.8) | 800  | 46.8   | 68.6 (10.3) |
| <b>PSP/DEGESCO Stage II (hist. + PSP-RS)</b>   | 119 | 54.6   | 69.2 (8.2) | 500  | 54.6   | 68.1 (10.5) |
| <b>TOTAL</b>                                   | 465 |        |            | 1950 |        |             |

N, sample size; SD, standard deviation.

\*Controls: Mean age at last visit; histopathological PSP: Mean age at death; clinical PSP: Mean age at motor symptoms onset.

**Extended Data Table 3.** Summary statistics of the replication in Spanish and Portuguese population of PSP GWS susceptibility *loci* reported to date. The direction column shows the effect directions in the PSP/DEGESCO Stage I histopathological, PSP/DEGESCO Stage I PSP-RS, and PSP/DEGESCO Stage II, respectively. Genomic coordinates correspond to the GRCh38 assembly. EA, effect allele; OA, other allele; OR, odds ratio; SE, standard error; P, p-value; CI, confidence interval.

| rs         | CHR   | POS       | EA | OA | Gene             | OR***<br>(reported) | PSP/DEGESCO |      |                        |         |          | Direction |
|------------|-------|-----------|----|----|------------------|---------------------|-------------|------|------------------------|---------|----------|-----------|
|            |       |           |    |    |                  |                     | OR          | SE   | P                      | CI 2.5% | CI 97.5% |           |
| rs8070723  | chr17 | 46003698  | A  | G  | <i>MAPT</i>      | 5.51 <sup>1</sup>   | 4.02        | 0.13 | 9.89·10 <sup>-27</sup> | 3.12    | 5.19     | +++       |
| rs242557*  | chr17 | 45942346  | G  | A  | <i>MAPT</i>      | 0.51 <sup>1</sup>   | 0.72        | 0.09 | 2.49·10 <sup>-04</sup> | 0.61    | 0.86     | ---       |
| rs1768208  | chr3  | 39481512  | G  | A  | <i>MOBP</i>      | 0.69 <sup>1</sup>   | 0.76        | 0.08 | 1.02·10 <sup>-03</sup> | 0.64    | 0.89     | ---       |
| rs7571971  | chr2  | 88595833  | C  | T  | <i>EIF2AK3</i>   | 0.77 <sup>1</sup>   | 0.80        | 0.09 | 9.06·10 <sup>-03</sup> | 0.68    | 0.95     | ---       |
| rs1411478  | chr1  | 180993146 | G  | A  | <i>STX6</i>      | 0.79 <sup>1</sup>   | 0.84        | 0.08 | 2.63·10 <sup>-02</sup> | 0.71    | 0.98     | ---       |
| rs11568563 | chr12 | 21304500  | A  | C  | <i>SLCO1A2</i>   | 0.67 <sup>1</sup>   | 0.54        | 0.13 | 1.17·10 <sup>-06</sup> | 0.42    | 0.69     | ---       |
| rs6687758  | chr1  | 221991606 | A  | G  | <i>DUSP10</i>    | 0.80 <sup>1</sup>   | 0.80        | 0.10 | 2.03·10 <sup>-02</sup> | 0.66    | 0.97     | ---       |
| rs6458446  | chr6  | 45532733  | A  | G  | <i>RUNX2</i>     | 0.77 <sup>2</sup>   | 0.90        | 0.10 | 0.27                   | 0.75    | 1.09     | +-        |
| rs429358   | chr19 | 44908684  | C  | T  | <i>APOE (ε4)</i> | 0.55 <sup>3</sup>   | 0.72        | 0.15 | 2.46·10 <sup>-02</sup> | 0.53    | 0.96     | ---       |
| rs7412     | chr19 | 44908822  | T  | C  | <i>APOE (ε2)</i> | 2.39 <sup>3</sup>   | 1.08        | 0.16 | 0.64                   | 0.78    | 1.49     | ++        |

|                   |      |          |   |   |                 |                   |      |      |      |      |      |      |
|-------------------|------|----------|---|---|-----------------|-------------------|------|------|------|------|------|------|
| <b>rs369580**</b> | chr6 | 32052461 | A | G | <i>TNXB/C4A</i> | 1.43 <sup>4</sup> | 1.25 | 0.19 | 0.24 | 0.86 | 1.82 | ++NA |
|-------------------|------|----------|---|---|-----------------|-------------------|------|------|------|------|------|------|

---

\* Adjusted by MAPT H1 dose (rs1122380)

\*\* This variant was not correctly imputed in PSP/DEGESCO Stage II.

\*\*\*Study: 1 - Sanchez-Contreras *et al.* 2018<sup>1</sup>. 2 - Chen *et al.* 2018<sup>2</sup>, 3- Wang *et al.* 2023 (medRxiv)<sup>3</sup>; 4- Farrell *et al.* 2023 (BioRxiv)<sup>4</sup>

---

**Extended Data Table 4.** Main features of the cohorts available for meta-analysis.

| Study                                             | Variants available | PSP         |           |            | Control      |           |             |
|---------------------------------------------------|--------------------|-------------|-----------|------------|--------------|-----------|-------------|
|                                                   |                    | N           | Males (%) | Age (SD)   | N            | Males (%) | Age (SD)    |
| Höglinger <i>et al.</i> 2011 <sup>5</sup>         | 4,099              | 2120        | 54.0      | ~66.5 (NA) | 6847         | NA        | NA          |
| Sanchez-Contreras <i>et al.</i> 2018 <sup>1</sup> | 37                 | 533         | 55.0      | 75.0 (7.6) | 1172         | 52.5      | 77.0 (8.9)  |
| PSP/DEGESCO Stage I (histopathological)           | 8,990,045          | 156         | 56.4      | 76.5 (9.5) | 650          | 56.5      | 67.8 (10.1) |
| PSP/DEGESCO Stage I (PSP-RS)                      | 9,008,824          | 112         | 48.2      | 67.2 (7.8) | 800          | 46.8      | 68.6 (10.3) |
| PSP/DEGESCO Stage II (hist. + PSP-RS)             | 8,433,148          | 119         | 54.6      | 69.2 (8.2) | 500          | 54.6      | 68.1 (10.5) |
| Amsterdam Dementia Cohort (PSP-RS)                | 8,794,028          | 59          | 54.2      | 67.7 (5.5) | 1513         | 58.5      | 62.3 (10.5) |
| <b>Meta-analysis</b>                              | <b>36</b>          | <b>3099</b> |           |            | <b>11482</b> |           |             |

N, sample size; SD, standard deviation.

\*Controls: Mean age at last visit; histopathological PSP: Mean age at death; clinical PSP: Mean age at motor symptoms onset.



**Extended Data Table 5. Summary statistics of the meta-analysis of the 36 SNPs available SNPs including data from the Höglinger *et al.*<sup>5</sup> and Sanchez-Contreras *et al.*<sup>1</sup> studies, PSP/DEGESCO and ADC.** Genomic coordinates correspond to the GRCh38 assembly. EA, effect allele; OA, other allele; OR, odds ratio; P, p-value; EAF, effect allele frequency; SE, standard error; CI, confidence interval; I<sup>2</sup>, heterogeneity estimate.

***\*SUPPLIED SEPARATELY IN EXCEL FORMAT\****

**Extended Data Table 6. Top enriched genesets using the WebGestalt Over Representation Analysis including the 6 PSP loci replicated in the PSP/DEGESCO cohort (*MAPT*, *MOBP*, *EIF2AK3*, *STX6*, *DUSP10* and *SLCO1A2*) and the novel *NFASC* locus.** Size depicts the number of genes in the geneset. Overlap depicts the number of genes in our input list present in the geneset. Expect depicts the number of genes expected to overlap with each geneset at random given the number of imputed genes.

| geneSet    | Description                                       | Size | Overlap | Expect     | Enrichment Ratio | P        | FDR  | database           |
|------------|---------------------------------------------------|------|---------|------------|------------------|----------|------|--------------------|
| GO:0097386 | glial cell projection                             | 23   | 2       | 0.01047563 | 190.9            | 4.48E-05 | 0.06 | Cellular Component |
| GO:0031072 | heat shock protein binding                        | 113  | 2       | 0.05146724 | 38.9             | 1.10E-03 | 0.52 | Molecular Function |
| GO:0007272 | ensheathment of neurons                           | 118  | 2       | 0.05374455 | 37.2             | 1.20E-03 | 0.52 | Biological Process |
| GO:0043209 | myelin sheath                                     | 155  | 2       | 0.07059666 | 28.3             | 2.05E-03 | 0.67 | Cellular Component |
| GO:0019902 | phosphatase binding                               | 177  | 2       | 0.08061683 | 24.8             | 2.67E-03 | 0.68 | Molecular Function |
| GO:0009266 | response to temperature stimulus                  | 192  | 2       | 0.08744876 | 22.9             | 3.13E-03 | 0.68 | Biological Process |
| GO:0051348 | negative regulation of transferase activity       | 258  | 2       | 0.11750927 | 17.0             | 5.58E-03 | 0.69 | Biological Process |
| GO:0042063 | gliogenesis                                       | 261  | 2       | 0.11887566 | 16.8             | 5.70E-03 | 0.69 | Biological Process |
| GO:0051961 | negative regulation of nervous system development | 294  | 2       | 0.13390591 | 14.9             | 7.19E-03 | 0.69 | Biological Process |
| GO:0048638 | regulation of developmental growth                | 312  | 2       | 0.14210424 | 14.1             | 8.06E-03 | 0.69 | Biological Process |

P, p-value; FDR, false discovery rate adjusted p-value.

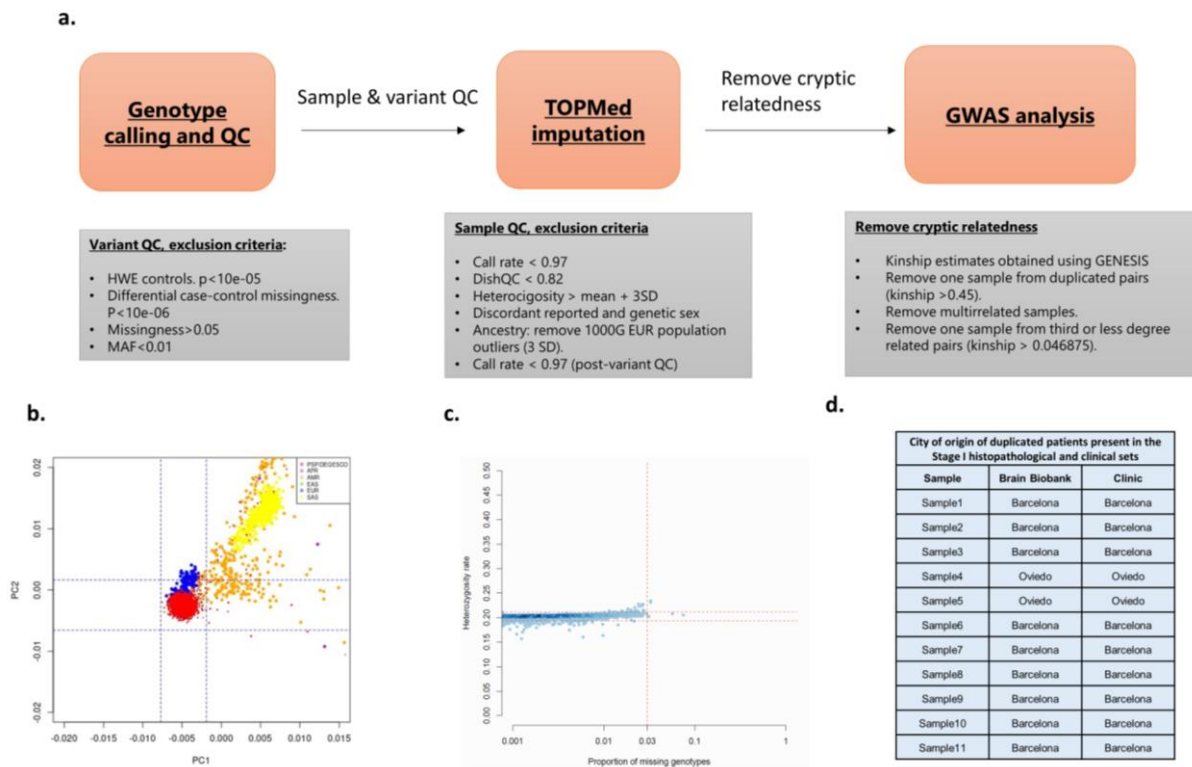

**Extended Data Fig. 1.a.** Overview of the quality control process for PSP cases and controls. **b.** Scatterplot of the first two principal components calculated using the 1000 Genomes dataset<sup>6</sup>, showing the different 1000G populations and the samples in PSP/DEGESCO Stage I. We removed samples in PSP/DEGESCO that were outliers (3 standard deviations away from the mean) with respect to the 1000G European cluster. **c.** Scatterplot representing sample call rates and heterozygosity rates in PSP/DEGESCO Stage I. Contaminated samples are expected to display an increase in both the proportion of uncalled genotypes and heterozygosity rate. **d.** City of origin of duplicated individuals found across PSP/DEGESCO Stage I clinics and brain biobanks.

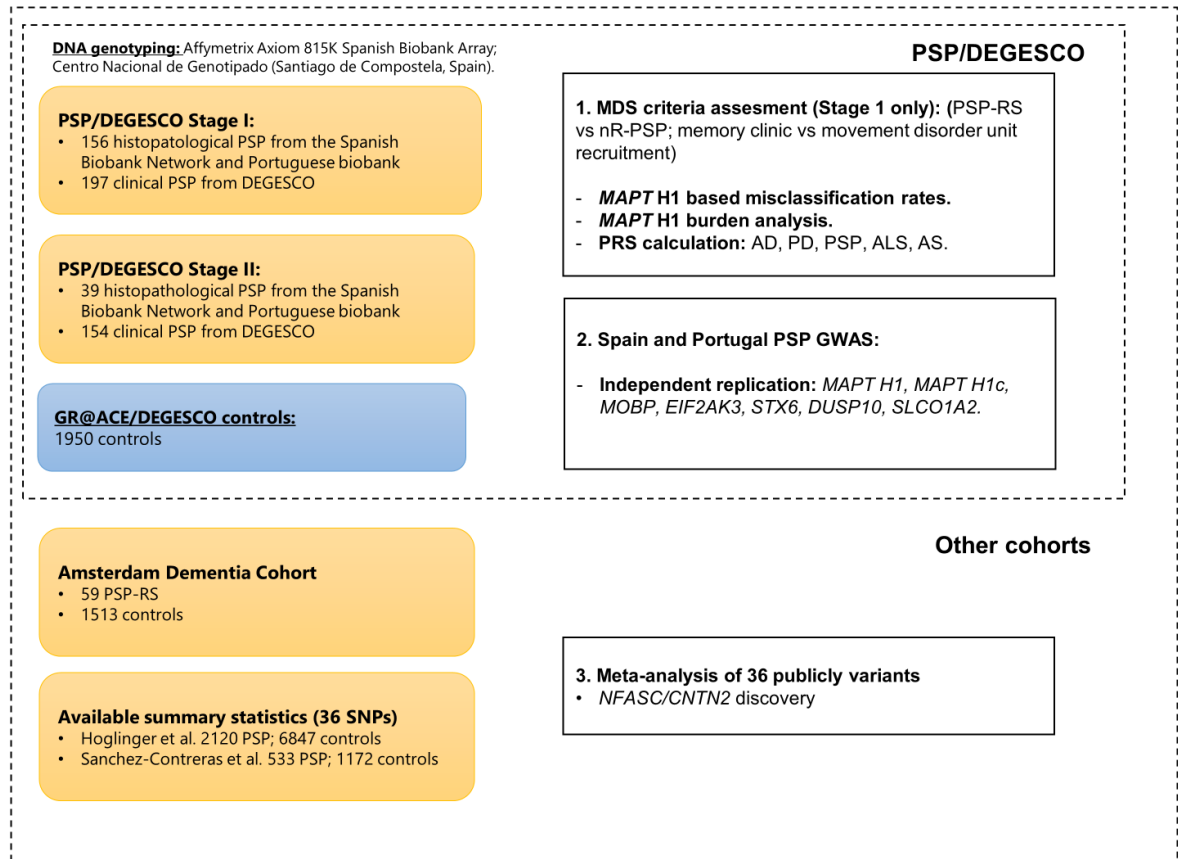

**Extended Data Fig. 2.** Schematic depiction of cohorts used and steps taken in our study.

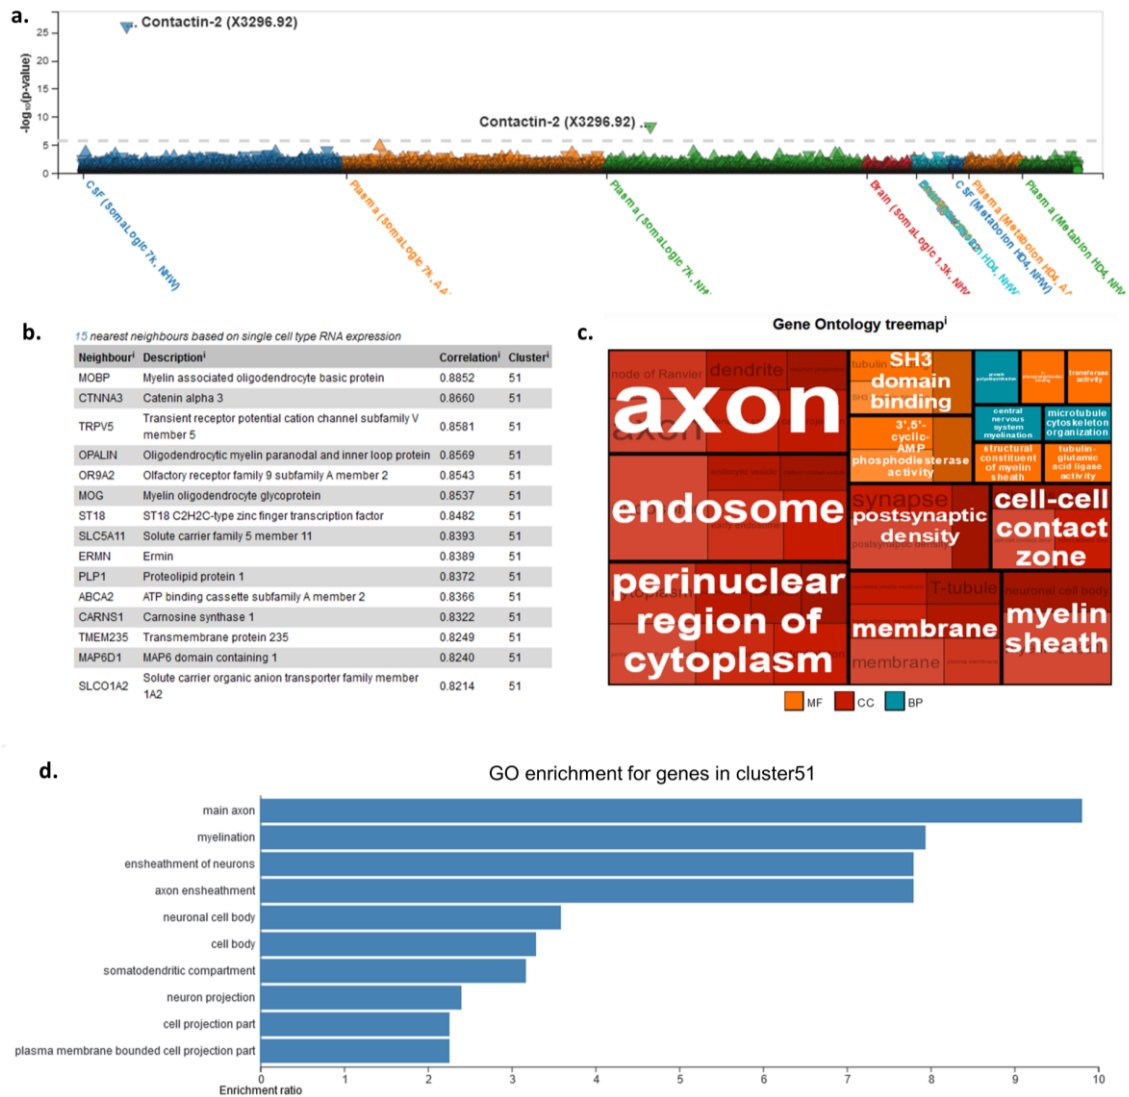

**Extended Data Fig. 3.** **a.** Association of rs4951151, the top variant detected in the *NFASC/CNTN2* locus with quantitative endophenotypes available on ONTIME <https://ontime.wustl.edu/><sup>7</sup>. Significant signals were observed for contactin-2 protein levels in CSF and plasma. **b.** Top correlated genes in the Human Protein Atlas single cell expression cluster<sup>8</sup> for *CNTN2*, referred to as ‘cluster 51’. **c.** Gene ontology treemap of the expression cluster 51, showing the main molecular functions, cellular components and biological processes enriched among these genes. **d.** Gene ontology enrichment for genes in cluster 51 performed using WebGestalt<sup>9</sup>.

*NFASC* expression levels by cell type:

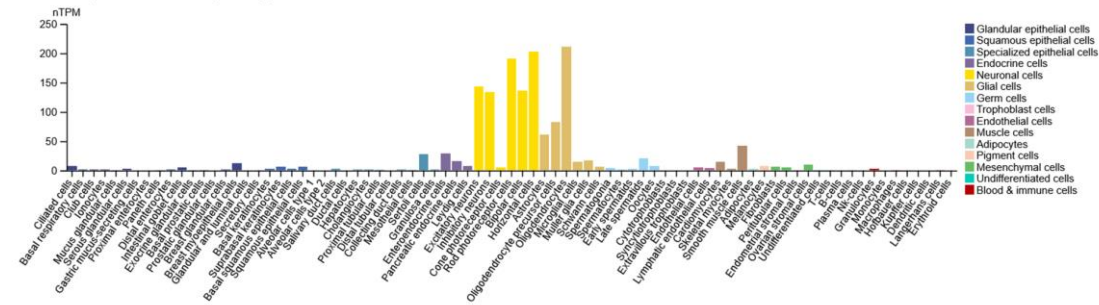

*CNTN2* expression levels by cell type:

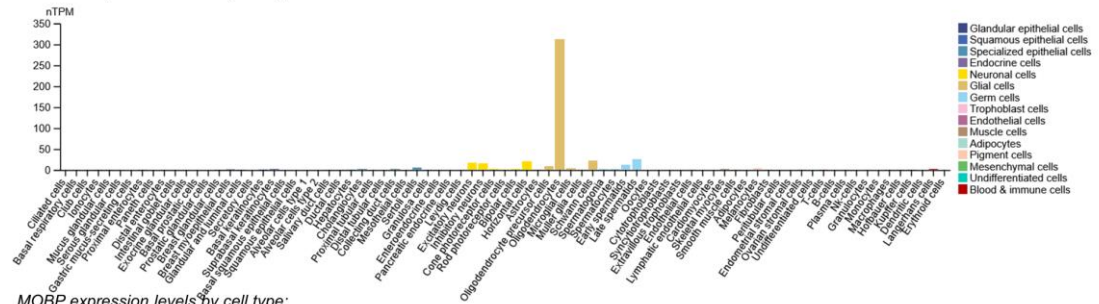

*MOBP* expression levels by cell type:

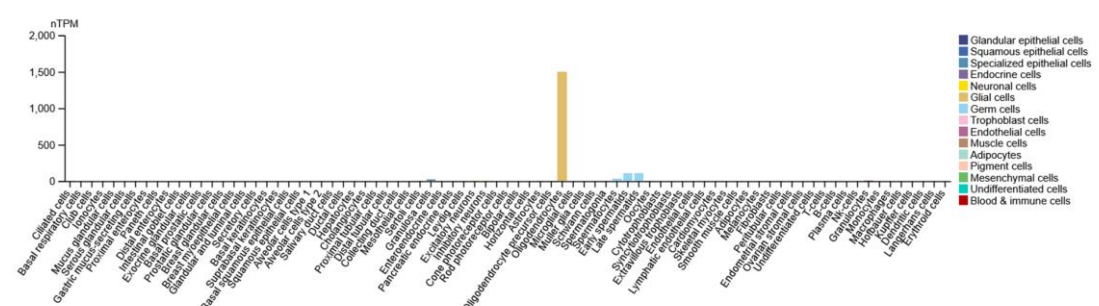

*SLCO1A2* expression levels by cell type:

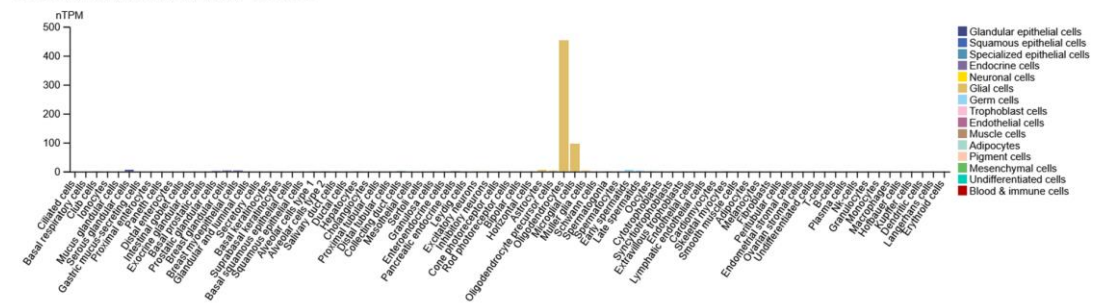

*DUSP10* expression levels by cell type:

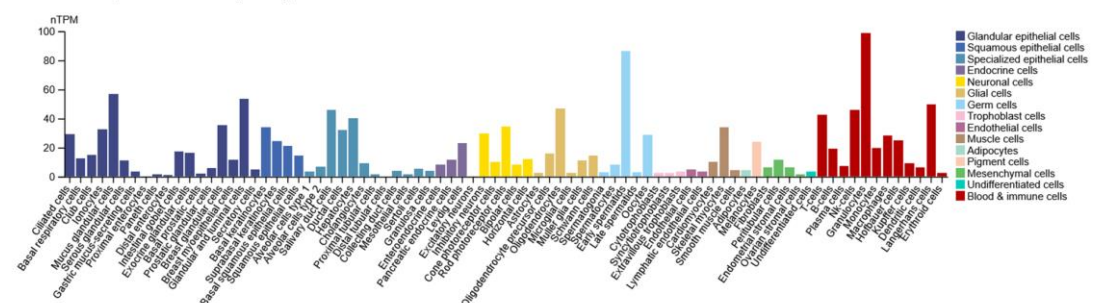

**Extended data Fig. 4.** RNA expression levels by cell type for *MOBP*, *SLCO1A2*, *DUSP10*, *NFASC* and *CNTN2*, respectively, based on data from the Human Protein Atlas<sup>8</sup>.

1

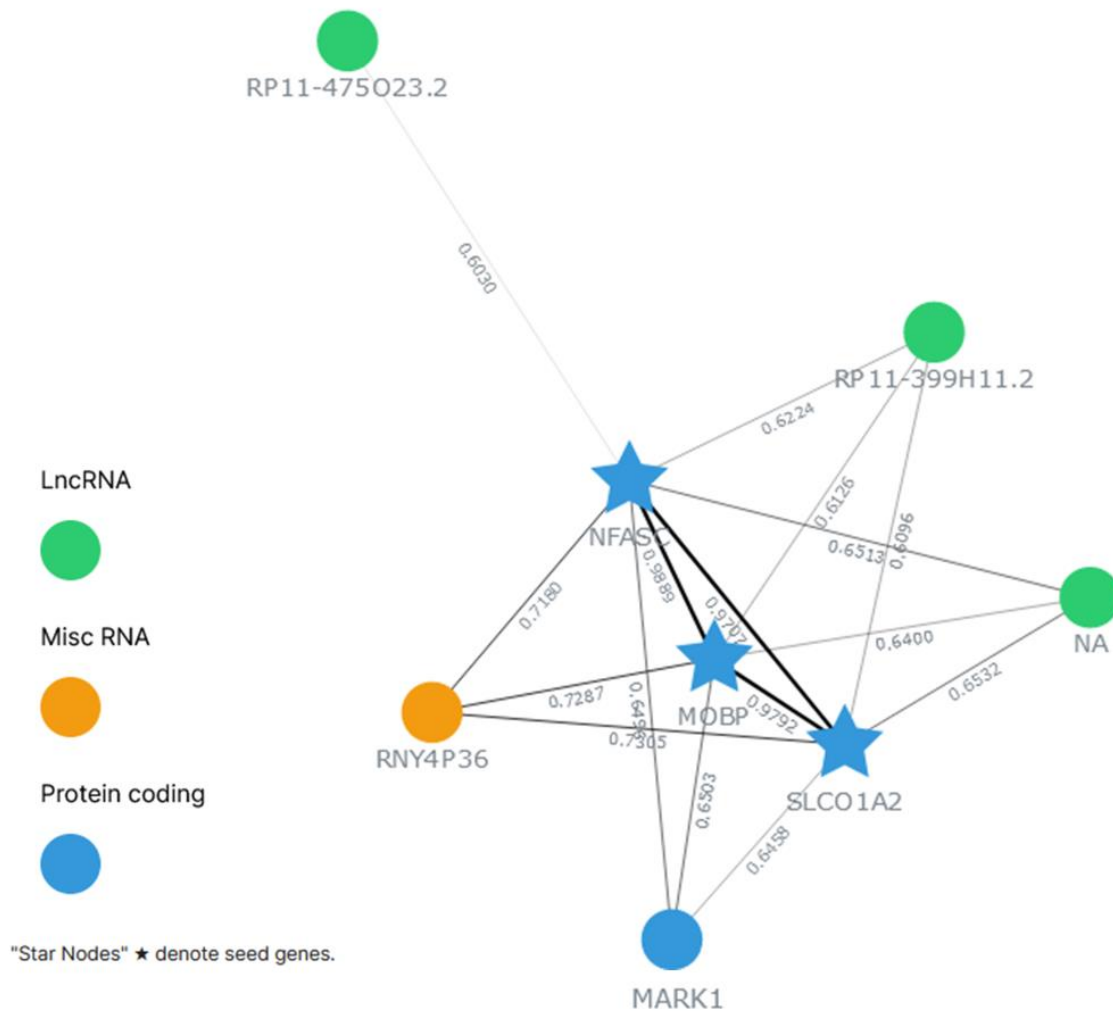

2

3

4 **Extended Data Fig. 5.** Gene coexpression network generated using GeneFriends<sup>10</sup> from our input  
5 gene list: *MAPT*, *MOBP*, *EIF2AK3*, *STX6*, *DUSP10*, *SLCO1A2*, *NFASC* and *CNTN2*. Edges were  
6 labelled with the Pearson correlation coefficient existent between transcripts belonging to the  
7 network.

8



## 9 References

- 10 1. Sanchez-Contreras, M. Y. *et al.* Replication of progressive supranuclear palsy genome-wide  
11 association study identifies SLC6A2 and DUSP10 as new susceptibility loci. *Mol*  
12 *Neurodegeneration* **13**, 37 (2018).
- 13 2. Chen, J. A. *et al.* Joint genome-wide association study of progressive supranuclear palsy  
14 identifies novel susceptibility loci and genetic correlation to neurodegenerative diseases. *Mol*  
15 *Neurodegeneration* **13**, 41 (2018).
- 16 3. Wang, H. *et al.* Whole-Genome Sequencing Analysis Reveals New Susceptibility Loci and  
17 Structural Variants Associated with Progressive Supranuclear Palsy. Preprint at  
18 <http://medrxiv.org/lookup/doi/10.1101/2023.12.28.23300612> (2023).
- 19 4. Farrell, K. *et al.* Genetic, Transcriptomic, Histological, and Biochemical Analysis of  
20 Progressive Supranuclear Palsy Implicates Glial Activation and Novel Risk Genes. Preprint  
21 at <http://biorxiv.org/lookup/doi/10.1101/2023.11.09.565552> (2023).
- 22 5. PSP Genetics Study Group *et al.* Identification of common variants influencing risk of the  
23 tauopathy progressive supranuclear palsy. *Nat Genet* **43**, 699–705 (2011).
- 24 6. The 1000 Genomes Project Consortium *et al.* A global reference for human genetic variation.  
25 *Nature* **526**, 68–74 (2015).
- 26 7. Yang, C. *et al.* Genomic atlas of the proteome from brain, CSF and plasma prioritizes  
27 proteins implicated in neurological disorders. *Nat Neurosci* **24**, 1302–1312 (2021).
- 28 8. Karlsson, M. *et al.* A single-cell type transcriptomics map of human tissues. *Sci. Adv.* **7**,  
29 eabh2169 (2021).
- 30 9. Wang, J., Vasaikar, S., Shi, Z., Greer, M. & Zhang, B. WebGestalt 2017: a more  
31 comprehensive, powerful, flexible and interactive gene set enrichment analysis toolkit.  
32 *Nucleic Acids Research* **45**, W130–W137 (2017).
- 33 10. Raina, P. *et al.* GeneFriends: gene co-expression databases and tools for humans and  
34 model organisms. *Nucleic Acids Research* **51**, D145–D158 (2023).

35



36 Supplementary Information: A Novel Susceptibility Locus in *NFASC*  
37 Highlights Oligodendrocytes and Myelination in Progressive Supranuclear  
38 Palsy Pathology

39 1. Supplementary notes: DNA genotyping, QC & imputation in the PSP/DEGESCO cohort

40 DNA from PSP cases was extracted from 25 mg of cerebellar cortex (histopathological PSP) or  
41 peripheral blood (clinical PSP). After excluding samples with insufficient concentration (<5  
42 ng/ $\mu$ L) or degraded DNA, samples were genotyped by the Spanish National Center for  
43 Genotyping (CEGEN) using the Axiom 815K Spanish Biobank Array (Thermo Fisher). We  
44 performed genotype calling and QC using Affymetrix power tools (APT) software v1.15.0  
45 following the Axiom data analysis workflow. We kept samples with dishQC values >0.82, a  
46 parameter determined by measuring the resolution of AT and GC channels within monomorphic  
47 SNPs, and genotype call rates >0.97. We also checked that the average call rate within plates was  
48 >0.985 to detect potentially problematic batches. We jointly performed genotype calling for the  
49 remaining PSP samples and 5,000 Spanish controls obtained from the GR@ACE/DEGESCO  
50 cohort, which had been previously genotyped with the same platform, using the same array and  
51 in the same centre, thus minimizing potential batch effects<sup>1,2</sup>. Called variants passing quality  
52 control (QC) criteria defined by the manufacturer (Affymetrix) were kept for downstream analysis  
53 (N=737,174).

54 After genotype calling, we removed samples with low genotype call rates (<97%) and high  
55 heterozygosity (+3SD over mean heterozygosity). To identify mislabelled samples, we performed  
56 a sex-check and removed those with discordant reported and genetic sex. We ran a principal  
57 component (PC) analysis to identify and remove samples from non-European ancestries based on  
58 the 1000 Genomes European population cluster (Extended Data Fig. 1). After sample QC, we  
59 removed variants with high missingness (>5%), low frequency (MAF<0.01), differential  
60 missingness between cases and controls ( $p<10^{-5}$ ) or failing the Hardy Weinberg equilibrium test  
61 ( $p<10^{-6}$ ) in the control population. Samples with genotype call rates below 0.97 after variant QC  
62 were also removed from the dataset. Genotype imputation was performed for 379 PSP samples  
63 and 4,955 controls in the TOPMed Imputation Server (Michigan, USA) using the TOPMed  
64 reference panel based on 587,195 genotyped variants passing QC. Prior to GWAS analysis, we  
65 used the GENESIS R package<sup>3</sup> to detect and remove potential cryptic relatedness within our  
66 population. We first used a kinship filter of 0.45 to identify and remove sample pairs  
67 corresponding to the same individual (N=11). After removing duplicates, we detected related  
68 pairs by applying a kinship filter of 0.046875, which represents the theoretical kinship value  
69 between third- and fourth-degree relatedness. We first removed the samples present in multiple  
70 related pairs, and for the remaining unique relative pairs we applied the following criteria: 1) if

71 one sample was a PSP and the other one was a control we removed the control; 2) if one sample  
72 was a histopathologically confirmed PSP the other sample was a clinical PSP, we kept the  
73 histopathological PSP; 3) if both samples belonged to the same clinical group (control, clinical or  
74 histopathological PSP), we kept the sample with the highest genotype call rate. For  
75 PSP/DEGESCO Stage II samples, we performed the genotype calling including the controls and  
76 cases passing QC from Stage I, and followed the same procedure described above. Additionally,  
77 at the IBD filtering step we removed Stage II cases overlapping or related to cases from Stage I.  
78 An overview of the complete QC process is provided (Extended Data Fig. 1, Extended Data Table  
79 1, Supplementary Table 1).

## 80 2. Supplementary notes: DNA genotyping, QC & imputation in the Amsterdam Dementia 81 Cohort

82 We genotyped all individuals using the Illumina Global Screening Array and applied established  
83 quality control methods<sup>4</sup>. We used high-quality genotypes in all individuals (individual call rate  
84 >99%, variant call rate >99%), individuals with sex mismatches were excluded and departure  
85 from Hardy-Weinberg equilibrium was considered significant at  $p < 1 \times 10^{-6}$ . Genotypes were then  
86 lifted over to GRCh38 and prepared for imputation using provided scripts (HRC-1000G-check-  
87 bim.pl) specifying TOPMED as reference panel. This script compares variant ID, strand, and  
88 allele frequencies to the TOPMED reference panel (version r2, N=194,512 haplotypes from  
89 N=97,256 individuals)<sup>5</sup>. Finally, all variants were submitted to the Michigan Imputation server  
90 (<https://imputation.biodatacatalyst.nih.gov/>). The server uses EAGLE (v2.4) to phase data  
91 and Minimac4 to perform genotype imputation to the reference panel. After quality control and  
92 genotype imputation of the genetic data, we kept only individuals of European ancestry (based on  
93 1000Genomes clustering)<sup>6</sup>, and excluded individuals with a family relation (identity-by-descent  
94  $\geq 0.2$ )<sup>7</sup>, leaving 59 clinically diagnosed PSP-RS cases and 1513 controls for analysis.

95

## 96 3. Supplementary notes: Detecting potential clinical heterogeneity using genetic 97 information.

98 We leveraged the *MAPT* H1 haplotype, a well-known genetic risk factor for PSP<sup>8</sup>, to make  
99 inferences on misdiagnose rates in the Stage I clinical PSP dataset and its subgroups. We  
100 considered the confirmed pathological PSP cases as a reference of a pure PSP group, and the  
101 controls as a reference for a non-PSP population. Theoretically, for a mix of PSP and non-PSP  
102 samples, the expected value of the *MAPT* H1 allele frequency (AF) should range between its  
103 frequency in the pure/histopathological PSP ( $H1_{\text{Freq}}=0.9199$ ), and the non-PSP ( $H1_{\text{Freq}}=0.7024$ )  
104 populations in our study, and should be proportional to the ratio of PSP/non-PSP samples in the  
105 mix. Thus, the *MAPT* H1 AF in the mixed sample would be equal to the *MAPT* H1 AF in the

106 histopathological PSP sample minus the difference in AF between the histopathological PSP and  
107 control groups, (i.e. the total AF range between the pure PSP and non-PSP groups), multiplied by  
108 the proportion of misdiagnosed samples in the mix:

$$109 \quad Fg = Fh - M \cdot (Fh - Fc)$$

110 *Fg*: MAPT H1 AF in the mixed group; *Fh*: MAPT H1 AF in the histopathological PSP group (AF=0.9199);  
111 *M*: misdiagnose rate; *Fc*: MAPT H1 AF in the non PSP group (AF=0.7024); In the case of using logistic  
112 regression-derived effect sizes instead of frequencies, the log(OR) of these groups can be introduced instead  
113 of AF values.

114 Rearranging the terms in this equation, we can estimate the percentage of misclassified samples  
115 in each group:

$$116 \quad \text{Misdiagnose (\%)} = 100 \cdot \frac{Fh - Fg}{Fh - Fc}$$

117 ( $Fh - Fg$ ), difference in MAPT H1 AF between the histopathological PSP and mixed group.

118 ( $Fh - Fc$ ), difference in MAPT H1 AF between the histopathological PSP and the general  
119 population.

120 The same logic can be applied using linear effect size estimates (log odds ratios) derived from  
121 logistic regressions instead of AFs. As population microstructure might affect the MAPT H1 allele  
122 frequency in the Iberian population<sup>9</sup>, we also calculated the misclassification rates using the log  
123 odds ratios obtained from fitting logistic regressions adjusted by the first four PCs in each  
124 subgroup. For better comparability between all groups, we included the controls from the  
125 discovery and validation setup (N=1,450) in all models. Additionally, because a proportion of the  
126 misclassified patients are expected to have Parkinson's Disease (PD)<sup>10</sup> and the MAPT H1 locus  
127 is known to also be a risk factor for PD, we used a OR=1.00 (neutral) and a OR=1.32 (Parkinson's  
128 Disease MAPT H1)<sup>11</sup> to calculate the effect size-based misdiagnosis estimations.

#### 129 4. Supplementary notes: PRS calculation

130 We calculated the PRS of AD, PD, amyotrophic lateral sclerosis (ALS), PSP and all stroke (AS)  
131 using reported genome-wide significant variants<sup>12-16</sup>. We constructed the PRSs selecting only  
132 those variants with MAF>0.01 and imputation quality R2>0.3 in our dataset (Supplementary  
133 Tables 3-7). A few considerations were taken in the AD PRS calculation: a) No APOE variants  
134 were included, b) variants with MAF<0.01 were kept since these were previously validated in the  
135 original publication and they had very good imputation quality in our dataset (R2>0.9), c) because  
136 some controls of our study were included in the first stage of the AD GWAS, we used the  
137 independent effects reported exclusively in the second stage. To calculate the different PRSs, we  
138 designed a custom software ([https://github.com/Pablo-GarGon/PRS\\_Generator](https://github.com/Pablo-GarGon/PRS_Generator)) that added the

139 dosages of the risk alleles multiplied by their reported effect sizes (betas). Finally, we also  
140 calculated the PRSs excluding the chromosome 17 to avoid pleiotropic effects caused by  
141 including variants linked to the *MAPT* locus.

142 5. Supplementary notes: A Decreased burden of known PSP genetic risk factors was  
143 detected in atypical PSP clinically diagnosed cases

144 Because, to our very best knowledge, this the first case-control PSP GWAS including clinical  
145 cases diagnosed using the recently proposed MDS criteria for probable PSP<sup>17</sup>, and our *MAPT* H1  
146 association results suggested the existence of phenotypic heterogeneity in our clinical PSP cohort  
147 (Fig. 1), we decided to estimate genetically-based misclassification rates in the available Stage I  
148 clinical PSP subjects (Supplementary Table 1). We classified these samples into four subgroups  
149 based on two criteria: a) Samples with or without confirmed Richardson's Syndrome and b)  
150 samples recruited by movement disorder units or memory clinics. The first classification allowed  
151 us to examine the specificity of the MDS criteria for assigning a probable PSP diagnosis to non-  
152 Richardson PSP (nR-PSP) patients, while the second one is useful to study potential ascertainment  
153 bias caused by the recruitment in different neurology set-ups (movement disorders units and  
154 memory clinics). As expected, the highest *MAPT* H1 frequency and effect size was found in the  
155 histopathological PSP group, and the misclassification estimates were considerably larger for nR-  
156 PSP than for PSP-RS samples (Fig. 1, Supplementary Table 1). Moreover, *MAPT* H1 frequencies  
157 were significantly reduced in the nR-PSP patients compared to histopathological PSP ( $\chi^2=6.29$ ;  
158  $DF=1$ ;  $p=0.01$ ), while no significant differences were observed for the PSP-RS patients in this  
159 comparison ( $\chi^2=0.16$ ;  $DF=1$ ;  $p=0.69$ ), supporting the presence of misclassified patients in the nR-  
160 PSP group. Interestingly, PSP-RS samples had similar misclassification rates despite recruitment  
161 centre, while nR-PSP samples recruited in memory clinics displayed lower misdiagnose rates than  
162 those recruited by movement disorder units, although these differences were not significant  
163 ( $\chi^2=1.38$ ;  $DF=1$ ;  $p=0.24$ ).

164 To further complement these results, we generated the AD, PD, ALS, PSP and AS PRSs using  
165 known disease susceptibility variants and compared the PRS values between our PSP subgroups  
166 and controls (Supplementary Fig. 1, Supplementary Table 10). The AD PRS was significantly  
167 increased in both nR-PSP subgroups: memory-clinic ( $OR[95\%CI]=2.42[1.10-5.35]$ ;  $p=0.03$ ) and  
168 movement disorder unit-recruited ( $OR[95\%CI]=2.64[1.13-6.22]$ ;  $p=0.03$ ). Meanwhile, the PD  
169 PRS was associated with disease status in both groups recruited by movement disorder units: PSP-  
170 RS ( $OR[95\%CI]=1.90[1.22-2.96]$ ;  $p=0.004$ ) and nR-PSP ( $OR[95\%CI]=1.72[1.00-2.93]$ ;  
171  $p=0.05$ ). Finally, the PSP PRS was associated with disease status in all subgroups except  
172 movement disorder recruited nR-PSP ( $OR[95\%CI]=1.20[0.96-1.52]$ ;  $p=0.12$ ), and no significant  
173 associations were found between disease status and the ALS and AS PRSs. Because *MAPT* is a

174 pleiotropic risk factor for multiple neurodegenerative diseases, we repeated this analysis  
175 excluding chromosome 17. After removing variants in the *MAPT* locus, an increase could still be  
176 observed for the AD PRS in the nR-PSP subgroups and for the PD PRS in movement disorder  
177 unit-recruited subgroups, but the statistical significance was lost (Supplementary Fig. 1,  
178 Supplementary Table 7). Interestingly, the association with the PSP PRS was lost in both nR-PSP  
179 subgroups, and even showed a non-significant opposite effect direction in movement disorder  
180 recruited nR-PSP patients ( $OR[95\%CI]=0.69[0.32-1.48]$ ;  $p=0.34$ ). Furthermore, none of the  
181 individual known PSP risk variants were associated with disease status in this subgroup either  
182 (Fig. 1). Our results indicate that the movement disorder recruited nR-PSP patients lacked an  
183 enrichment not only for *MAPT* H1 haplotypes but also for other known PSP risk factors.  
184 Subgroup-specific association of each individual risk variant constituting the different PRSs is  
185 available (Supplementary Tables 10-14).

186 Our data suggests two possible sources of contamination in our clinical dataset. On the one hand,  
187 nR-PSP patients who do not evolve to PSP-RS, the hallmark PSP phenotype, are hard to  
188 conclusively diagnose pre-mortem<sup>18</sup>. Thus, a weaker enrichment in known genetic PSP risk  
189 factors and, conversely, an enrichment in risk factors for other neurodegenerative diseases can be  
190 somewhat expected in the nR-PSP group. On the other hand, the observed enrichment in PD  
191 genetic risk variants in the context of movement disorder units suggests the presence of a fraction  
192 of misclassified parkinsonian PSP-like phenocopies in this clinical setting<sup>19</sup>. PSP-P patients  
193 comprise up to a third of the total number of PSP patients and are particularly challenging to  
194 accurately diagnose based solely on clinical symptoms<sup>20</sup>. As these patients are characterized by  
195 an initial phase with PD-compatible features, a higher chance of recruitment by movement  
196 disorder units rather than by memory clinics might explain our results<sup>21</sup>. However, a smaller risk  
197 effect of the *MAPT* H1 haplotype has also been described in PSP-P subjects compared to PSP-  
198 RS<sup>22</sup>, which may also explain the decrease in *MAPT* H1 frequency we observed in the nR-PSP  
199 groups. Overall, our findings suggest that there might be room for improvement of the specificity  
200 of the MDS criteria by increasing the diagnostic accuracy of atypical PSP phenotypes, specially  
201 PSP-P. Various biomarkers are under development to further help discriminate PSP from PSP-  
202 like patients: Real time quaking induced conversion (RT-QuIC) techniques to discard  $\alpha$ -synuclein  
203 parkinsonian pathology, or for confirmation of 4R tauopathy are underway as CSF biomarkers,  
204 and MRI parameters like the magnetic resonance parkinsonism index are showing promising  
205 results in predicting PSP-RS conversion in early PSP-P subjects<sup>21</sup>.

206

207 6. Supplementary notes: Sensitivity analysis of PSP sentinels

208 Based on our previous results, we decided to run a sensitivity analysis for known PSP risk  
209 variants, based on GWS hits by Sanchez-Contreras *et al*<sup>15</sup>, stratifying our Stage I cases in three  
210 groups of decreasing PSP certainty: histopathological PSP, PSP-RS and nR-PSP. To improve  
211 comparability of the calculated estimates, we included the complete set of Stage I controls  
212 (N=1450) in all three strata. For all tested variants, we found consistent effect directions between  
213 the histopathological and PSP-RS groups (Supplementary Fig. 2). The effects in the nR-PSP  
214 group were smaller or even had opposite directions for the tested variants, except for rs242557,  
215 the variant tagging the *MAPT* H1c haplotype suggesting it may similarly impact genetic  
216 susceptibility to PSP-like syndromes. Finally, we decided to repeat the meta-analysis of the Stage  
217 I discovery and validation datasets, this time keeping only the PSP-RS samples in the validation  
218 set. After removing nR-PSP samples, the effect sizes were stronger in all PSP susceptibility  
219 variants (Supplementary Table 9), showcasing the benefits of removing these samples with lower  
220 diagnostic accuracy from our GWAS analysis.

#### 221 7. Supplementary notes: Enrichment analysis

222 Enrichment analysis was performed using WebGestalt (<https://www.webgestalt.org/>) over-  
223 representation analysis<sup>23</sup>. Briefly, this method evaluates the fraction of genes which constitute the  
224 different gene sets that are present in the list of genes introduced, testing the significance using a  
225 2x2 contingency table<sup>24</sup>. We introduced the list of replicated genes (*MAPT*, *MOBP*, *EIF2AK3*,  
226 *STX6*, *DUSP10*, *SLCO1A2*) and our novel *NFASC* gene and ran the over representation analysis  
227 algorithm, enriching specifically for non-redundant gene ontology terms and using the “Affy  
228 Axiom Biobank1” option as the reference gene set. Although none of the top enriched terms were  
229 significant after multiple test correction (Extended Data Table 6), the term GO:0097386,  
230 representing glial cell projection was borderline significant (FDR adjusted p-value = 0.06) and  
231 several of the top ranked terms were related to axon ensheathment and myelination, pinpointing  
232 these processes as those more represented by our list of genes.

#### 233 8. Supplementary notes: Gene co-expression network analysis.

234 Gene co-expression networks were generated using GeneFriends software  
235 (<https://www.genefriends.org/>)<sup>25</sup>, including all interesting confirmed loci and candidates (*MAPT*,  
236 *MOBP*, *EIF2AK3*, *STX6*, *DUSP10*, *SLCO1A2*, *NFASC* and *CNTN2*) using the Sequence Read  
237 Archive (SRA) human tissue co-expression map as a reference, which comprises 20 tissues from  
238 46080 RNA-seq samples. Briefly, this method first estimates correlations between each pair of  
239 genes, then uses co-expression associations to construct the co-expression network, and finally  
240 modules, i.e. groups of co-expressed genes are identified using clustering techniques, allowing to  
241 group those genes with similar expression patterns across the different samples. The Pearson  
242 correlation threshold was adjusted to 0.6 to allow us to identify the top genes co-expressed with



243 our main cluster, consisting of *MOBP*, *SLCO1A2* and *NFASC*. We found that *MARK1*, as well as  
244 three additional lncRNAs and one pseudogene, were strongly co-expressed ( $R>0.6$ ) with this gene  
245 cluster (Extended Data Fig. 5).



246 **Supplementary Table Legends**

247 **Supplementary Table 1.** QC summary of contributed samples by collaborating center and stage.

248 **Supplementary Table 2.** Age linear regressions results for the complete set of controls used in  
249 PSP/DEGESCO Stage I (N=1450). Genomic coordinates correspond to the GRCh38 assembly.

250 **Supplementary Table 3.** Reported summary statistics of the variants used to construct the  
251 Alzheimer's Disease (AD) PRS. We used exclusively effects from stage 2 of the Bellenguez *et al.*  
252 study<sup>12</sup>. Genomic coordinates correspond to the GRCh38 assembly.

253 **Supplementary Table 4.** List of the variants used to construct the amyotrophic lateral sclerosis  
254 (ALS) PRS. These summary statistics correspond to the European ancestry GWAS from the  
255 original study. Genomic coordinates correspond to the GRCh38 assembly.

256 **Supplementary Table 5.** List of the variants used to construct the all stroke (AS) PRS. Genomic  
257 coordinates correspond to the GRCh38 assembly.

258 **Supplementary Table 6.** List of the variants used to construct the Parkinson's Disease (PD) PRS.  
259 Genomic coordinates correspond to the GRCh38 assembly.

260 **Supplementary Table 7.** List of the variants used to construct the progressive supranuclear palsy  
261 (PSP) PRS. Genomic coordinates correspond to the GRCh38 assembly.

262 **Supplementary Table 8.** Estimation of the percentage of misdiagnosed clinical PSP samples  
263 classified by those with/without Richardson's Syndrome and by recruitment centre (Movement  
264 Disorder Unit/Memory Clinic) in PSP/DEGESCO Stage I. ORs were calculated fitting logistic  
265 regressions adjusted by the first four PCs and using the same set of controls in all groups  
266 (N=1450). Percentage of misdiagnosed samples was calculated based on MAPT H1 haplotype  
267 frequencies and log odds ratios. Age data represents age at death, age at onset of motor symptoms  
268 and age at last visit for histopathological PSP, clinical PSP and controls, respectively.

269 **Supplementary Table 9.** Sensitivity analysis results for the replicated variants. We showcase the  
270 results obtained in the previous study and the PSP/DEGESCO meta-analysis results including and  
271 excluding nR-PSP samples. Models were adjusted by the first four PCs. EA, effect allele; OA,  
272 other allele; OR, odds ratio; P, p-value.

273 **Supplementary Table 10.** Association in case control logistic regression of neurodegenerative  
274 disease PRSs with PSP in the different clinical subgroups. PRSs were calculated using all reported  
275 variants, and removing variants in chr17 to account for MAPT pleiotropy. Associations are  
276 reported in the following format: OR [95% CI]; P. OR, odds ratio; PRS, polygenic risk score; AD,  
277 Alzheimer's Disease; PD, Parkinson's Disease; ALS, amyotrophic lateral sclerosis; PSP,  
278 progressive supranuclear palsy; AS, all stroke.

279 **Supplementary Table 11.** Association in case control logistic regression of the individual  
280 variants used to construct the Alzheimer's Disease (AD) PRS with the different PSP subgroups in  
281 PSP/DEGESCO Stage I.

282 **Supplementary Table 12.** Association in case control logistic regression of the individual  
283 variants used to construct the amyotrophic lateral sclerosis (ALS) PRS with the diferent PSP  
284 subgroups in PSP/DEGESCO Stage I.

285 **Supplementary Table 13.** Association in case control logistic regression of the individual  
286 variants used to construct the all stroke (AS) PRS with the diferent PSP subgroups in  
287 PSP/DEGESCO Stage I.

288 **Supplementary Table 14.** Association in case control logistic regression of the individual  
289 variants used to construct the Parkinson's disease (PD) PRS with the diferent PSP subgroups in  
290 PSP/DEGESCO Stage I.

291 **Supplementary Table 15.** Association in case control logistic regression of the individual  
292 variants used to construct the progressive supranuclear palsy (PSP) PRS with the diferent PSP  
293 subgroups in PSP/DEGESCO Stage I.

294 **Supplementary Figures**

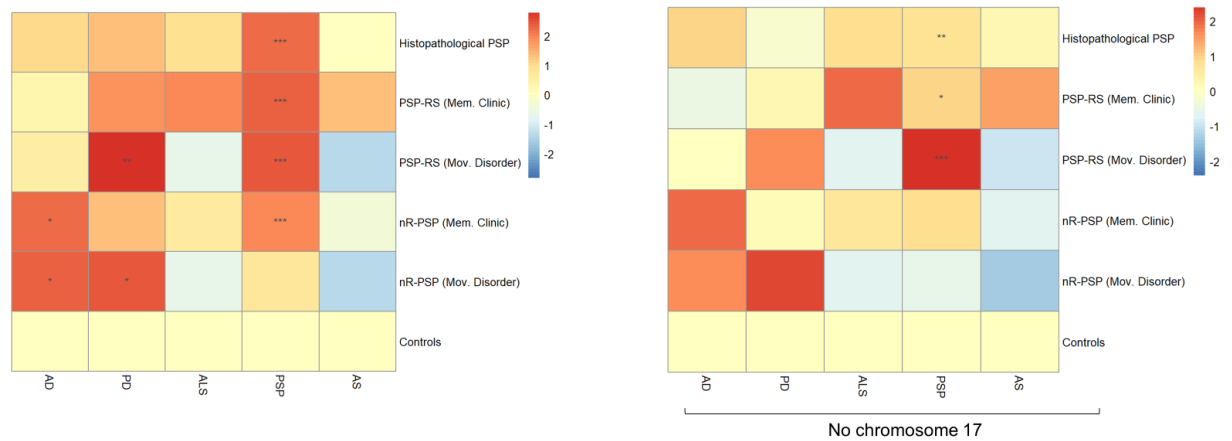

295

296 **Supplementary Fig. 1.** Mean AD, PD, ALS, PSP and AS PRS in each PSP subgroup including  
297 and excluding variants in chr17. Values were zero-centred with respect to the control group to  
298 better reflect the increase/decrease in mean PRS in the PSP groups with respect to the controls.  
299 OR, odds ratio; PRS, polygenic risk score; AD, Alzheimer's Disease; PD, Parkinson's Disease;  
300 ALS, amyotrophic lateral sclerosis; PSP, progressive supranuclear palsy; AS, all stroke; \*\*\*  
301  $p < 0.001$ ; \*\*  $p < 0.01$ ; \*  $p < 0.05$ .

302

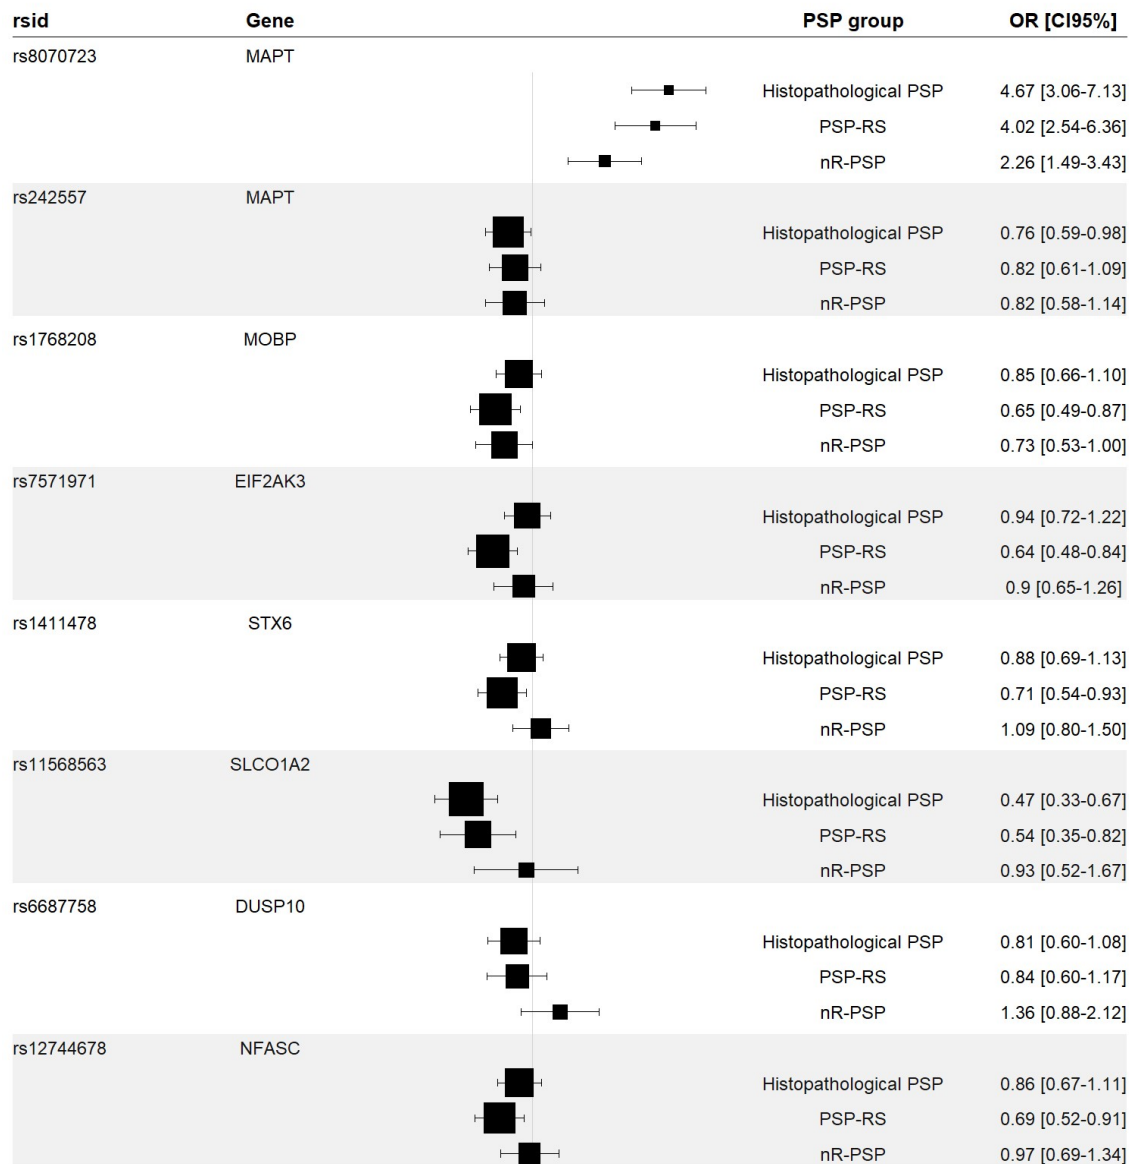

303

304

305 **Supplementary Fig. 2. Forest plot displaying effect sizes of SNPs in the histopathological**  
 306 **and clinical groups (PSP-RS or nR-PSP) of PSP/DEGESCO Stage I.** Models were adjusted  
 307 by PCs1-4 and included the same set of controls (N=1450) to improve comparability. OR, odds  
 308 ratio; CI95%, 95% confidence interval.

309

310

311

312

313

314

315

316

## 317 **Supplementary References**

- 318 1. de Rojas, I. *et al.* Common variants in Alzheimer's disease and risk stratification by  
319 polygenic risk scores. *Nature Communications* (2021) doi:10.1038/s41467-021-22491-8.
- 320 2. Moreno-Grau, S. *et al.* Genome-wide association analysis of dementia and its clinical  
321 endophenotypes reveal novel loci associated with Alzheimer's disease and three causality  
322 networks: The GR@ACE project. *Alzheimer's and Dementia* (2019)  
323 doi:10.1016/j.jalz.2019.06.4950.
- 324 3. Gogarten, S. M. *et al.* Genetic association testing using the GENESIS R/Bioconductor  
325 package. *Bioinformatics* (2019) doi:10.1093/bioinformatics/btz567.
- 326 4. Das, S. *et al.* Next-generation genotype imputation service and methods. *Nat Genet* **48**,  
327 1284–1287 (2016).
- 328 5. Taliun, D. *et al.* Sequencing of 53,831 diverse genomes from the NHLBI TOPMed Program.  
329 *Nature* **590**, 290–299 (2021).
- 330 6. The 1000 Genomes Project Consortium *et al.* A global reference for human genetic variation.  
331 *Nature* **526**, 68–74 (2015).
- 332 7. Anderson, C. A. *et al.* Europe PMC Funders Group Data quality control in genetic case-  
333 control association studies. *Nature Protocols* (2011) doi:10.1038/nprot.2010.116.Data.
- 334 8. Baker, M. *et al.* Association of an Extended Haplotype in the Tau Gene with Progressive  
335 Supranuclear Palsy. *Human Molecular Genetics* **8**, 711–715 (1999).
- 336 9. Gayán, J. *et al.* Genetic Structure of the Spanish Population. *BMC Genomics* **11**, 326 (2010).
- 337 10. Höglinger, G. U. *et al.* Identification of common variants influencing risk of the  
338 tauopathy progressive supranuclear palsy. in *Nature Genetics* (2011). doi:10.1038/ng.859.
- 339 11. Simón-Sánchez, J. *et al.* Genome-wide association study reveals genetic risk underlying  
340 Parkinson's disease. *Nat Genet* **41**, 1308–1312 (2009).
- 341 12. Bellenguez, C. *et al.* New insights into the genetic etiology of Alzheimer's disease and  
342 related dementias. *Nat Genet* **54**, 412–436 (2022).

- 343 13. Nalls, M. A. *et al.* Identification of novel risk loci, causal insights, and heritable risk for  
344 Parkinson's disease: a meta-analysis of genome-wide association studies. *Lancet Neurol* **18**,  
345 1091–1102 (2019).
- 346 14. van Rheenen, W. *et al.* Common and rare variant association analyses in amyotrophic  
347 lateral sclerosis identify 15 risk loci with distinct genetic architectures and neuron-specific  
348 biology. *Nat Genet* **53**, 1636–1648 (2021).
- 349 15. Sanchez-Contreras, M. Y. *et al.* Replication of progressive supranuclear palsy genome-  
350 wide association study identifies SLCO1A2 and DUSP10 as new susceptibility loci. *Mol*  
351 *Neurodegeneration* **13**, 37 (2018).
- 352 16. Mishra, A. *et al.* Stroke genetics informs drug discovery and risk prediction across  
353 ancestries. *Nature* **611**, 115–123 (2022).
- 354 17. Höglinger, G. U. *et al.* Clinical diagnosis of progressive supranuclear palsy: The  
355 movement disorder society criteria: MDS Clinical Diagnostic Criteria for PSP. *Mov Disord.*  
356 **32**, 853–864 (2017).
- 357 18. Respondek, G. *et al.* Accuracy of the national institute for neurological disorders and  
358 stroke/society for progressive supranuclear palsy and neuroprotection and natural history in  
359 Parkinson plus syndromes criteria for the diagnosis of progressive supranuclear palsy.  
360 *Movement Disorders* **28**, 504–509 (2013).
- 361 19. Boxer, A. L. *et al.* Advances in progressive supranuclear palsy: new diagnostic criteria,  
362 biomarkers, and therapeutic approaches. *The Lancet Neurology* **16**, 552–563 (2017).
- 363 20. Alster, P., Madetko, N., Koziorowski, D. & Friedman, A. Progressive Supranuclear  
364 Palsy—Parkinsonism Predominant (PSP-P)—A Clinical Challenge at the Boundaries of PSP  
365 and Parkinson's Disease (PD). *Front. Neurol.* **11**, 180 (2020).
- 366 21. Coughlin, D. G. & Litvan, I. Progressive supranuclear palsy: Advances in diagnosis and  
367 management. *Parkinsonism Relat Disord* **73**, 105–116 (2020).
- 368 22. Williams, D. R. *et al.* Characteristics of two distinct clinical phenotypes in  
369 pathologically proven progressive supranuclear palsy: Richardson's syndrome and PSP-  
370 parkinsonism. *Brain* **128**, 1247–1258 (2005).

- 371 23. Wang, J., Vasaikar, S., Shi, Z., Greer, M. & Zhang, B. WebGestalt 2017: a more  
372 comprehensive, powerful, flexible and interactive gene set enrichment analysis toolkit.  
373 *Nucleic Acids Research* **45**, W130–W137 (2017).
- 374 24. Khatri, P., Sirota, M. & Butte, A. J. Ten Years of Pathway Analysis: Current  
375 Approaches and Outstanding Challenges. *PLoS Comput Biol* **8**, e1002375 (2012).
- 376 25. Raina, P. *et al.* GeneFriends: gene co-expression databases and tools for humans and  
377 model organisms. *Nucleic Acids Research* **51**, D145–D158 (2023).
- 378  
379  
380
